# Supplementary material for: Transcriptome Profiling of Epstein-Barr Virus Using Nanopore Sequencing
Source: Research Square preprint supplement (doi:10.21203/rs.3.rs-109629/v1), 2020-11-20
Supplement: Supplementary file 1 [file 52a6b8d210bbdd4f997c7693.xlsx]

## Sheet: Sheet1
Name	Start	Splice junction	Stop	Strand	Type	Deep-CAGE
BNRT10	1725		5866	+	Monocistronic	YES
BNRT1	1725	1798, 5408	5866	+	Previously annotated	YES
BNRT11	1725	1798, 3270, 3842, 5408	5866	+	Splice isoform	YES
BNRT12	1725	1798, 3270, 4222, 5408	5866	+	Splice isoform	YES
BNRT7	1725	4222, 5408	5866	+	Previously annotated	YES
BNRT4	1725	3842, 5408	5866	+	Previously annotated	YES
BCRF1	9558		10174	+	Short TSS variant	YES
BCLT5	10026		10622	-	Short TSS variant	YES
BHLT7	37908		38124	-	Short TSS variant	YES
BHLT8	37908		38273	-	Short TSS variant
BHLT9	37908		38141	-	Short TSS variant	YES
BHLT16	37908		37998	-	Non-coding	YES
BHLT5	37908		38313	-	Previously annotated
BHLT4	37908		38398	-	Previously annotated
BHLT15	37908		38033	-	Short TSS variant
BHLT14	37908		38648	-	Long TSS variant
BHLT13	37908		38773	-	Long TSS variant
BHLT12	37908		38898	-	Long TSS variant
BHLT11	37908		38938	-	Long TSS variant
BHLF1	37908		40397	-	Monocistronic
BHLF2	37908	38306, 38555	40397	-	Splice isoform
BHLT17	37908		38515	-	Long TSS variant
BHLT18	37908		39435	-	Long TSS variant
BHRT15	40561	40712, 41946	43152	+	Splice isoform	YES
BHRT16	40561		43152	+	Long TSS variant	YES
BHRT17	40561	41506, 41946	43152	+	Long TSS variant	YES
BHRT3	41399	41506, 41946	43152	+	Previously annotated	YES
BHRT13	41399		43152	+	Non-spliced	YES
BHRT18	41399	41527, 41946	43152	+	Splice isoform	YES
BHRT5	41553		43152	+	Previously annotated	YES
BHRT21	41553	41680, 41946	43152	+	Splice isoform	YES
BHRT6	41553	41689, 41946	43152	+	Previously annotated	YES
BHRT4	41553	41605, 41946	43152	+	Previously annotated	YES
BHRT19	41553	41586, 41946	43152	+	Splice isoform	YES
BHRT20	41553	41594, 41946	43152	+	Splice isoform	YES
BHRT7	41774		43152	+	Previously annotated	YES
BHRT8	42024		43152	+	Previously annotated	YES
BHRT14	42276		43152	+	Short TSS variant	YES
BHRT12	42287		43152	+	Previously annotated	YES
BFRT4	42473		43152	+	Previously annotated	YES
BFRT17	42612		43152	+	Non-coding	YES
BFRT16	42980		43152	+	Non-coding	YES
BFLT8	43580		44667	-	Short TSS variant	YES
BFLT9	43580		44736	-	Short TSS variant	YES
BFLT10	43580		46065	-	Long TSS variant	YES
BFLT7	43580		45239	-	Previously annotated	YES
BFLT11	43580		46148	-	Short TSS variant	YES
BFRT12	45727		49705	+	Polycistronic	YES
BFRT14	45727		46374	+	Non-coding	YES
BFRT13	45727		48336	+	Polycistronic	YES
BFRT11	46204		49705	+	Polycistronic	YES
BFRT7	46204		48336	+	Previously annotated	YES
BFRT8	46473		48336	+	Previously annotated	YES
BFRT15	46473		49705	+	Polycistronic	YES
BFRT19	47629		49705	+	Long TSS variant
BFRT3	48992		49705	+	Monocistronic	YES
BFRT18	49476		49705	+	Non-coding	YES
BFLT12	49663		50367	-	Putative protein coding	YES
BFLT13	49663		50043	-	Non-coding	YES
BROT3	62580		66440	+	Polycistronic	YES
BORF2	63734		66440	+	Monocistronic	YES
BART3	66367		69732	+	Polycistronic	YES
BMRT5	67404		69732	+	Polycistronic	YES
BMRT6	68347		69732	+	Long TSS variant	YES
BMRT4	68395		69732	+	Previously annotated	YES
BMRT7	68471		69732	+	Short TSS variant
BMRT8	68674		69732	+	Putative protein coding	YES
BSLT12	70262	71652, 71761	71860	-	Splice isoform	YES
BSLT13	70262	71654, 71761	71860	-	Short TSS variant	YES
BSLT11	70262	70262	71860	-	Previously annotated	YES
BLLT17	70262	71654, 79168	79539	-	Previously annotated	YES
BSLT18	70262	71652, 71761	72915	-	Splice isoform	YES
BSLT3	70262	71654, 71761	72915	-	Previously annotated	YES
BSLT20	70262		70464	-	Non-coding
BSLT4	70262		72915	-	Previously annotated	YES
BSLT19	70262	71654, 71761	73802	-	Long TSS variant	YES
BZLT37	70262	71654, 89470	89499	-	Previously annotated	YES
BZLT34	70262	71654, 89263	89499	-	Previously annotated	YES
BSLT21	70262		73802	-	Long TSS variant	YES
BSLT22	70262	71652, 71761	73802	-	Splice isoform	YES
BSLT23	70262	71654, 71761	71906	-	Short TSS variant	YES
BSLT24	70262	71650, 71761	72915	-	Splice isoform	YES
BSRT2	72979		75157	+	Previously annotated	YES
BSRT6	73272		75157	+	Short TSS variant
BSRT7	74451		75157	+	Short TSS variant	YES
BSRT3	74451		76965	+	Previously annotated	YES
BSRT8	74691		75157	+	Putative protein coding
BSRT5	74715		75157	+	Putative protein coding	YES
BLLF3	75123		76018	-	Monocistronic	YES
BSRT4	75170		76965	+	Previously annotated	YES
BLRT6	76075		76965	+	Polycistronic	YES
BLRT8	76075		82626	+	Polycistronic	YES
BLRT7	76427		76965	+	Short TSS variant	YES
BLLT33	76939	77360, 79168	79539	-	Short TSS variant	YES
BLLT24	76939		79539	-	Short TSS variant	YES
BLLT10	76939	77594, 79168	79539	-	Previously annotated	YES
BLLT25	76939	77594, 78033	79539	-	Polycistronic	YES
BLLT26	76939		77553	-	Short TSS variant	YES
BLLT27	76939		80787	-	Non-spliced	YES
BLLT29	76939	77594, 78033	78366	-	Long TSS variant	YES
BLLT28	76939	77406, 79168	79539	-	Splice isoform	YES
BELT4	76939	77594, 79168	80787	-	Previously annotated	YES
BELT5	76939	77594, 79168	83664	-	Long TSS variant	YES
BZLT24	76939	77594, 89263	89499	-	Previously annotated	YES
BZLT23	76939	77594, 89470	89499	-	Previously annotated	YES
BZLT29	76939	77594, 89221	89499	-	Previously annotated	YES
BLLT30	76939	77594, 78033, 78194, 79168	79539	-	Splice isoform	YES
BLLT31	76939	77594, 78758	79539	-	Splice isoform	YES
BLLT32	76939	77594, 78033, 78602, 79168	79539	-	Splice isoform	YES
BLLT14	76939	77360, 78033	79539	-	Previously annotated	YES
BELT10	76939	77360, 79168	80787	-	Long TSS variant	YES
BELT7	76939	77594, 78033	80787	-	Splice isoform	YES
BZLT54	76939	77594, 79168, 79332, 86716, 86998, 89470	89499	-	Splice isoform	YES
BLRT9	78430		78919	+	Antisense	YES
BERT3	82006		82626	+	Previously annotated	YES
BZLT44	82617	84445, 89263	89499	-	Alternatively terminating	YES
BELT8	82617		83559	-	Non-coding	YES
BELT9	82617		83664	-	Non-coding	YES
BELT1	82634		83664	-	Previously annotated	YES
BELT3	82634		83559	-	Previously annotated	YES
BZLT15	82634	84445, 89263	89499	-	Previously annotated	YES
BELT6	83165		83664	-	Non-coding	YES
BZLT45	85660	86998, 89221	89499	-	Alternatively terminating	YES
BZLT49	85660	86998, 89470	89499	-	Splice isoform	YES
BZLT52	85660		89499	-	Alternatively terminating	YES
BZLT48	86759	86998, 89263	89499	-	Splice isoform	YES
BZLT10	86759		89499	-	Previously annotated	YES
BZLT9	86797	86998, 89221	89499	-	Previously annotated	YES
BZLT46	86797		89499	-	Alternatively terminating	YES
BZLT50	86797	86998, 89263	89499	-	Splice isoform	YES
BZLT51	86797	86998, 89470	89499	-	Splice isoform	YES
BZLT47	88874		89499	-	Non-coding	YES
BZLF1	89497	89712, 89798, 89902, 90054	90600	-	Previously annotated	YES
BZLT39	89497	89712, 89803, 89902, 90054	90600	-	Splice isoform	YES
BZLT40	89497	89902, 90054	90600	-	Splice isoform	YES
BZLT41	89497	89712, 89794, 89902, 90054	90600	-	Splice isoform	YES
BZLT42	89497	89712, 89798, 89902, 90054	90633	-	Long TSS variant	YES
BZLT43	89497		90776	-	Non-spliced	YES
BZLT4	89497	89712, 90054	90776	-	Previously annotated	YES
BZLT5	89497	89712, 90054	90734	-	Previously annotated	YES
BZLT53	89497	89712, 90054	90600	-	Short TSS variant	YES
BRRF1	92446		93529	+	Monocistronic	YES
BRRT3	92643		93529	+	Previously annotated	YES
BRRT6	93672		95334	+	Short TSS variant	YES
BBRT7	93733		95334	+	Putative protein coding	YES
BKRT20	96845		97225	+	Putative protein coding	YES
BKRT7	96845		99074	+	Previously annotated	YES
BKRT8	96930		99074	+	Previously annotated	YES
BKRT18	97203		99074	+	Short TSS variant	YES
BKRT16	97446		99074	+	Polycistronic	YES
BKRT17	97575		99074	+	Polycistronic	YES
BKRT10	97897		99074	+	Previously annotated	YES
BKRT19	98087		99074	+	Short TSS variant
BKRT12	98193		99074	+	Previously annotated	YES
BKRT21	98529		99074	+	Short TSS variant	YES
BBLF4	99078		101638	-	Monocistronic	YES
BKLT1	99078		99710	-	Previously annotated	YES
BBLT10	99078		99966	-	Previously annotated	YES
BKLT2	99078		99689	-	Previously annotated	YES
BBRT17	101176		104070	+	Polycistronic	YES
BBRT4	102553		104070	+	Previously annotated	YES
BBRT15	102980		104070	+	Short TSS variant	YES
BBRT16	103060		104070	+	Short TSS variant	YES
BBRT18	103060		107642	+	Complex	YES
BBLT14	103929	104653, 104782	106310	-	Short TSS variant	YES
BBLT11	103929		106310	-	Non-spliced	YES
BBLT15	103929	104653, 104782	105974	-	Previously annotated	YES
BBLT9	103940	104653, 104782	105974	-	Previously annotated	YES
BBLT12	103940	104653, 104782	106310	-	Short TSS variant	YES
BBLT13	103940		106310	-	Non-spliced	YES
BBLT8	103940		105974	-	Previously annotated	YES
BDLT32	103940	104653, 104782, 105908, 119179	119708	-	Splice isoform	YES
BGLT29	103940	104653, 104782	111352	-	Complex	YES
BBRT14	106279		107642	+	Short TSS variant	YES
BBRT6	106398		107642	+	Previously annotated	YES
BBRT23	106751		107642	+	Putative protein coding
BBRT24	107189		107642	+	Putative protein coding	YES
BBLF1	108013		108566	-	Monocistronic	YES
BGLT21	108013		109903	-	Short TSS variant
BGLT15	108013		110514	-	Previously annotated	YES
BGLT22	108013		111136	-	Polycistronic	YES
BGLT19	108013		111352	-	Polycistronic	YES
BGLT20	108013		111456	-	Polycistronic	YES
BBLT24	108013		109409	-	Long TSS variant	YES
BBRT9	108554	108787, 116478	117632	+	Previously annotated	YES
BBRT19	108554	108787, 109453, 109792, 112490, 113139, 116478	117632	+	Splice isoform	YES
BBRT20	108554	108787, 109453, 109792, 111811, 113139, 116478	117632	+	Splice isoform	YES
BBRT21	108554	113139, 116478	117632	+	Splice isoform	YES
BBRT10	108554	108787, 112775, 113139, 116478	117632	+	Previously annotated	YES
BBRT22	108554	108787, 109453, 113139, 116478	117632	+	Splice isoform	YES
BGLT16	109426		111352	-	Polycistronic	YES
BGLT23	109426		111079	-	Short TSS variant	YES
BGLT25	109426		111136	-	Short TSS variant	YES
BGLT24	109426		111456	-	Polycistronic	YES
BGLT28	109426		114165	-	Non-spliced	YES
BDLT28	109426	109859, 119179	119708	-	Splice isoform	YES
BGRT9	111804	113139, 116478	117632	+	Long TSS variant	YES
BGRT2	112337	113139, 116478	117632	+	Previously annotated	YES
BGLT18	112732		114165	-	Monocistronic	YES
BGLT17	112732		115663	-	Polycistronic	YES
BGLT27	112732		114471	-	Long TSS variant	YES
BGLT26	112732		116611	-	Polycistronic	YES
BGLT8	112732		113127	-	Previously annotated	YES
BDLT33	112732		120585	-	Non-spliced	YES
BGLT30	112732		116282	-	Polycistronic	YES
BGRT5	115720	115927, 116478	117632	+	Previously annotated	YES
BGRT3	115720	116400, 116478	117632	+	Previously annotated	YES
BGRT4	115720	116175, 116478	117632	+	Previously annotated	YES
BGRT6	115720		117632	+	Previously annotated	YES
BGRT8	116228	116400, 116478	117632	+	Short TSS variant
BDLT19	117604		119708	-	Polycistronic	YES
BDLT8	117604		120585	-	Previously annotated	YES
BDLT20	117604		117861	-	Putative protein coding
BDLT22	117604		118336	-	Short TSS variant	YES
BDLT21	117604		118909	-	Short TSS variant	YES
BDLT23	117604		118993	-	Short TSS variant
BDLT26	117604		118716	-	Short TSS variant	YES
BDLT24	117604		118968	-	Short TSS variant	YES
BDLT25	117604		119044	-	Short TSS variant
BDLT27	117604	117722, 119179	119708	-	Polycistronic	YES
BDLT10	117604	117722, 119179	120585	-	Previously annotated	YES
BDLT29	117604	118558, 119179	119708	-	Polycistronic	YES
BDLT34	117604		118090	-	Putative protein coding	YES
BDLT35	117604		119059	-	Short TSS variant
BDLT36	117604		117791	-	Putative protein coding
BDLT7	120554		122459	-	Previously annotated	YES
BDLT5	120554		123055	-	Previously annotated	YES
BCLF1	120554		124939	-	Monocistronic	YES
BDLT30	120554		120850	-	Putative protein coding
BDLT31	120554		121727	-	Putative protein coding
BTRT2	127347		128254	+	Previously annotated	YES
BXLT14	128146		130518	-	Short TSS variant	YES
BXLT10	128146	129557, 130336	130518	-	Previously annotated	YES
BVLT4	128146		132378	-	Polycistronic
BXLT11	128146	128531, 130336	130518	-	Previously annotated	YES
BXLT15	128146		130543	-	Short TSS variant	YES
BXLT8	128146	129557, 130336	130543	-	Previously annotated	YES
BILT40	128146	129557, 130657, 130844, 137033	137529	-	Splice isoform	YES
BILT39	128146	129557, 130657, 130844, 137033	137799	-	Splice isoform	YES
BXLT16	128146	129398, 130336	130518	-	Short TSS variant	YES
BILT44	128146	129557, 130657, 130844, 137033	138771	-	Splice isoform	YES
BXLT17	128146		128517	-	Putative protein coding
BTLT1	128146		128517	-	Putative protein coding
BXRT3	131476		134450	+	Previously annotated	YES
BXRT4	131876		134450	+	Short TSS variant	YES
BVRT7	132425		134450	+	Short TSS variant	YES
BVRT6	132597		134450	+	Short TSS variant	YES
BVRT9	132597		137010	+	Complex	YES
BVRT8	135017		137010	+	Polycistronic	YES
BdRT4	135917		137010	+	Long TSS variant	YES
BdRT3	135941		137010	+	Monocistronic	YES
BdRT7	136040		137010	+	Long TSS variant	YES
BdRT5	136188		137010	+	Long TSS variant	YES
BdRT2	136242		137010	+	Previously annotated	YES
BdRT6	136254		137010	+	Short TSS variant	YES
BIRT18	136337		137010	+	Non-coding	YES
BIRT19	136390		137010	+	Non-coding	YES
BIRT20	136429		137010	+	Non-coding	YES
BIRT24	136776		137010	+	Non-coding	YES
BIRT17	136810		137010	+	Non-coding	YES
BILT34	136999		137799	-	Short TSS variant	YES
BILT35	136999		137629	-	Short TSS variant
BILT33	136999		137529	-	Previously annotated	YES
BILT27	136999		138239	-	Previously annotated	YES
BILT25	136999		138634	-	Previously annotated	YES
BILT24	136999		138771	-	Previously annotated	YES
BILT45	136999		142964	-	Polycistronic	YES
RPMS2	137907	138031, 149126, 149622, 149782, 149893, 154809, 154891, 156069, 156279, 156388, 156470, 158167, 158293, 159323	160071	+	Splice isoform
RPMS3	137907	138031, 138993, 139098, 145776, 145877, 149126, 149622, 149782, 149893, 154809, 156283, 156388, 156470, 158167	160071	+	Splice isoform
RPMS4	137907	138031, 145776, 145877, 149126, 149622, 149782, 149893, 154809, 156279, 156388, 156470, 158167	160071	+	Splice isoform
RPMS5	137907	138031, 149126, 149622, 149782, 149893, 154809, 156279, 156388, 156470, 158167	160071	+	Splice isoform
BILT36	140239		140494	-	Non-coding
LF3	140239		142964	-	Monocistronic	YES
BIRT21	143128	143279, 213269	214475	+	Splice isoform	YES
BIRT22	144271	144335, 145776, 145877, 149126, 149257, 149782, 149893, 159323, 159460, 165605, 165999, 171381, 171595, 172349, 172519, 172603, 172818, 172897, 173005, 176731	177187	+	Splice isoform	YES
BIRT23	144271	144335, 145776, 145877, 149126, 149257, 149468, 149893, 159323, 159460, 165605, 165999, 172897, 173005, 176731	177187	+	Splice isoform	YES
BILT10	148552		149552	-	Previously annotated	YES
BILT37	148552		149927	-	Short TSS variant	YES
BILT38	148552		151293	-	Non-spliced	YES
BILT41	148552		149666	-	Long TSS variant
BILT47	148552	148852, 149096	149927	-	Splice isoform	YES
BILT8	148552		150043	-	Previously annotated	YES
BILT5	148552		150915	-	Previously annotated	YES
BILT3	148552		151317	-	Previously annotated	YES
BILT42	150920		151293	-	Non-coding	YES
BILT43	150920		151317	-	Non-coding	YES
BALT12	150920		155958	-	Polycistronic	YES
BALT10	155766		155958	-	Non-coding	YES
BALF4	155766		158421	-	Monocistronic	YES
BALT9	155766		157262	-	Previously annotated	YES
BALT13	155766		157315	-	Long TSS variant	YES
BART15	156075	156470, 158167	160071	+	Splice isoform	YES
BART2	156075	156279, 156388, 156470, 158167, 158425, 159323	160071	+	Previously annotated	YES
BART4	156075	156279, 156388, 156470, 158167, 158293, 159323	160071	+	Previously annotated	YES
BART5	157326		160071	+	Previously annotated	YES
BART16	157326	157460, 158167, 158425, 159323, 159460, 165605, 165999, 172349, 172519, 172603, 172818, 172897, 173005, 176731	177187	+	Splice isoform	YES
BALF2	160075		163866	-	Monocistronic	YES
BALT8	160075		160720	-	Previously annotated	YES
BALT11	163913		164496	-	Short TSS variant	YES
BALT6	163913		164824	-	Previously annotated	YES
BART14	164582		165271	+	Previously annotated	YES
BNLT12	166007		166572	-	Short TSS variant	YES
BNLT11	166007		166685	-	Previously annotated	YES
BNLT7	166007		168206	-	Previously annotated	YES
BNLT6	166007	168003, 168081	168206	-	Previously annotated	YES
BNLT10	166007		167790	-	Previously annotated	YES
