# Supplementary material for: Transcriptome Profiling of Epstein-Barr Virus Using Nanopore Sequencing
Source: Research Square preprint supplement (doi:10.21203/rs.3.rs-109629/v1), 2020-11-20
Supplement: Supplementary file 2 [file 5481642b4115088c4356e90d.xlsx]

## Sheet: Sheet1
Transcript	ORF	ORF type	Amino acid seq.	Coding Probability	Coding label	Query cov.	Per.Ident.	Protein	Accession
BNRT11	ORF6	Frameshift	MEERGRETQMPVARYGGPFIM	0.97575225626249	yes	1	100.00%	BNRF1	AGL80641.1
BNRT12	ORF4	Frameshift	MEERGRETQMPVARYGGPFIM	0.99994104954934	yes	1	100.00%	BNRF1	AGL80641.1
BHLF2	ORF3	Frameshift	MQHPRMSSRTRQAGHALGEGTGWEQGGGVPGPQPPAGNPGVPGQQSKRTTPIRTLPADAATPRGAPEPGKPGTPWGRDRRGWGPGDHAPTLHSRCSGAPGTPAAPGPGGGAAVSSGATPHPERGSGPADPPAAALLPPERQEPRLPLDLAAAQRCPAGPPPTRSGAAAQRTHRRPPCCPRSARNPGCPWTWRRRSGVQRGHPPPGAGQRPSGPTGGRPAAPGAPGTPAAPGPGGGAAVSSGATPHPERGSGPADPPAAALLPPERQEPRLPLDLAAAQRCPAGPPPTRSGAAAQRTHRRPPCCPRSARNPGCPWTWRRRSGVQRGHPPPGAGQRPSGPTGGRPAAPGAPGTPAAPGPGGGAAVSSGATPHPERGSGPADPPAAALLPPERQEPRLPLDL…	0.99999361774764	yes	1	77.38%	putative BHLF1	AGZ95156.1
BSLT12	ORF1	Frameshift	MVPSQRLSRTSSISSNEDPAEPHSGTRSGLRHQHRLRYGPYGRQRRTLHRWRDFILRGGG	0.99998671198946	yes	0.38	95.65%	BSLF2/BMLF1	CEQ33594.1
BSLT18	ORF4	Frameshift	MVPSQRLSRTSSISSNEDPAEPHSGTRSGLRHQHRLRYGPYGRQRRTLHRWRDFILRGGG	0.99998583294295	yes	0.38	95.65%	BSLF2/BMLF1	CEQ33594.1
BSLT22	ORF2	Frameshift	MVPSQRLSRTSSISSNEDPAEPHSGTRSGLRHQHRLRYGPYGRQRRTLHRWRDFILRGGG	0.99999980960268	yes	0.38	95.65%	BSLF2/BMLF1	CEQ33594.1
BSLT24	ORF5	Frameshift	MVPSQRLSRTSSISSNEDPAATFWNSKRSQTPTQTAIWTLWTAAKNTPQMERFHPQRRRMKIQLRPTPYLHSPPAWS	0.99998583466322	yes	0.57	54.55%	BSLF2	AWG89195.1
BZLT54	ORF1	Nonsense termination	MVSFKQAHGSQT	0.61523629219398	yes	-	-	-	-
BZLT49	ORF1	Intergenic termination	MVSFKQAHGSQT	0.070214338159706	no	-	-	-	-
BZLT48	ORF1	Intergenic termination	MVSFKQVRVPLFTAIALVIVLLLAYFLPPRVRGGGRVAAAAITWVPKPNVEVWPVDPPPPVNFNKTAEQEYGDKEAHGSQT	0.15646742200069	no	0.92	100.00%	BZLF2	QCF50291.1
BZLT50	ORF1	Intergenic termination	MVSFKQVRVPLFTAIALVIVLLLAYFLPPRVRGGGRVAAAAITWVPKPNVEVWPVDPPPPVNFNKTAEQEYGDKEAHGSQT	0.15677219386068	no	0.92	100.00%	BZLF2	QCF50291.1
BZLT51	ORF1	Intergenic termination	MVSFKQAHGSQT	0.0094110998255754	no	-	-	-	-
BZLT39	ORF1	Frameshift	MMDPNSTSEDVKFTPDPYQVPFVQAFDQATRVYQDLGGPSQAPLPCVLWPVLPEPLPQGQLTAYHVSAAPTGSWFPAPQPAPENAYQAYAAPQLFPVSDITQNQLTNQAGGEAPQPGDNSTVQPAAAVVLACPGANQEQQLADIGAPQPAPAAAPARRTRKPLQPESLEECDSELEIKRYKNRVASRKCRAKFKHLLQHYRGFCQII	0.96807554447982	yes	0.97	100.00%	BZLF1	Q3KSS8.1
BZLT40	ORF1	Nonsense termination	MMDPNSTSEDVKFTPDPYQVPFVQAFDQATRVYQDLGGPSQAPLPCVLWPVLPEPLPQGQLTAYHVSAAPTGSWFPAPQPAPENAYQAYAAPQLFPVSDITQNQLTNQAGGEAPQPGDNSTVQPAAAVVLACPGANQEQQLADIGAPQPAPAAAPARRTRKPLQPESLEECDSELEIKRYKNRVASRKCRAKFKHLLQHYREVSIQ	0.97398177990226	yes	0.99	99.51%	BZLF1	Q3KSS8.1
BZLT41	ORF1	Frameshift	MMDPNSTSEDVKFTPDPYQVPFVQAFDQATRVYQDLGGPSQAPLPCVLWPVLPEPLPQGQLTAYHVSAAPTGSWFPAPQPAPENAYQAYAAPQLFPVSDITQNQLTNQAGGEAPQPGDNSTVQPAAAVVLACPGANQEQQLADIGAPQPAPAAAPARRTRKPLQPESLEECDSELEIKRYKNRVASRKCRAKFKHLLQHYREVSGFCQII	0.96342269129679	yes	0.97	99.02%	BZLF1	Q3KSS8.1
BZLT43	ORF1	Nonsense termination	MMDPNSTSEDVKFTPDPYQVPFVQAFDQATRVYQDLGGPSQAPLPCVLWPVLPEPLPQGQLTAYHVSAAPTGSWFPAPQPAPENAYQAYAAPQLFPVSDITQNQLTNQAGGEAPQPGDNSTVQPAAAVVLACPGANQEQQLADIGAPQPAPAAAPARRTRKPLQPESVRRGSRRAAADGGAQGGRQRTVGLKEGGSGRWGLFQLTRHHL	0.94773884769059	yes	1	95.22%	BZLF1	AAA65492.1
BBLT11	ORF3	Nonsense termination	MMETPAESVRARVSSVTFYNVTQTAGRWWAIWVVGIVPIKREDVETLIVVQACQPPLGGSLEPPVVNAPSTTELNFLRWERELRRSGGLIAMLADAAEKDLFDLSFRTRDRRLLSAARVEDEQGLIFQPLFPAQVVCQSCSGDDGRDQQPPPGDGFGSEVEGEQTCPHAQRHSESPGQLDVYIRTPRGDVFTYSTETPDDPSPVPFRDILRPVTYEVDLVSSDGATGRGGDARRHRVSLKILEPAGGFESWLVNSWSMAGGGLYAFLRSIYASCYANHRGTKPIFYLLDPELCPGGSDFQPYVPGFPFLPIHYVGRARPAFWHRAPHSEGLLLLDLNLGVSGTPLADALLGLDARSGQRRGSLLLQQIWPPTRKEINPRHVCTREGGEGGGEDETTVVG…	0.99999946078355	yes	1	100.00%	BBLF3	BAV60085.1
BBLT13	ORF3	Nonsense termination	MMETPAESVRARVSSVTFYNVTQTAGRWWAIWVVGIVPIKREDVETLIVVQACQPPLGGSLEPPVVNAPSTTELNFLRWERELRRSGGLIAMLADAAEKDLFDLSFRTRDRRLLSAARVEDEQGLIFQPLFPAQVVCQSCSGDDGRDQQPPPGDGFGSEVEGEQTCPHAQRHSESPGQLDVYIRTPRGDVFTYSTETPDDPSPVPFRDILRPVTYEVDLVSSDGATGRGGDARRHRVSLKILEPAGGFESWLVNSWSMAGGGLYAFLRSIYASCYANHRGTKPIFYLLDPELCPGGSDFQPYVPGFPFLPIHYVGRARPAFWHRAPHSEGLLLLDLNLGVSGTPLADALLGLDARSGQRRGSLLLQQIWPPTRKEINPRHVCTREGGEGGGEDETTVVG…	0.99999946114357	yes	1	100.00%	BBLF3	BAV60085.1
BDLT32	ORF2	Frameshift	MVDEQVAVEHGTVSHTISREEDGVVHERRVLASGERVEVFYKAPAPRPREGRASTFHDFTVPAAAAVPGPEPEPEPHPAMPIHANGGGETKTNTQDQNQNQTTRARTNAKAEERTAEMDDTMASSGGQRGAPISADLLSLSSLTGRMAAMAPSWMKSEHRWSAKAARGMMGGTNNPHLVMASGPRWRGNRHAPMLRGTLSLPDSWTYTSGHRVGMFSPIPPRLPTTPLPSPLGTSCDRSLMK	0.99999466567541	yes	0.65	100.00%	BDLF2	ANI26384.1
BILT47	ORF1	Deletion	MAEAYPGGAHAALASRRSSFRNSLRRLRPTEKPDTSFMRGVWKYEIFPSYVRVTNKQVLQLDAQCQELPPCPSVGQILSFKLPSFSFNTTTYGSRYFTVAFLFFGAEDNEVFLKPFFVMHSDQDIVLSVLNPRSLFIEKGKFTWYIVPIRLVKNPYLYLQILPGQSDIQLTRSCTQSGDKLNTSEPQIFLSGSPVTSQDECLPYLLAQHTPPFLKSYARIHTFPGKVCPVNAIRRGKGYVRVSVDTPDLKREGPLNVKEWKPGQTLKLTVRNISNNPITIVTGQSMAQAFFIYAGDPSISTIMRRYIQRQGCALTLPGNIVVESSSLPTFERINKTFNGNIVASEGTL	0.99994084634279	yes	1	100.00%	LF2	AWG88219.1
BART15	ORF3	Nonsense termination	MSMPPKGFLKKEMKPETRLLNKPPTVLTRLVMD	0.9204594936209	yes	0.96	93.75%	A73	QHE24154.1
