# Supplementary material for: Transcriptome Profiling of Epstein-Barr Virus Using Nanopore Sequencing
Source: Research Square preprint supplement (doi:10.21203/rs.3.rs-109629/v1), 2020-11-20
Supplement: Supplementary file 4 [file 8e3c7a6a35410b79d8a21f79.xlsx]

## Sheet: Sheet1
start	end	strand	junction	Novelty	EBV_Akata_lat_bc45	EBV_Akata_10m_bc37	EBV_Akata_90m_bc38	EBV_Akata_4h_bc39	EBV_Akata_8h_bc40	EBV_Akata_12h_bc41	EBV_Akata_24h_bc42	EBV_Akata_48h_bc43	EBV_Akata_72h_bc44	EBV_Akata_rand_bc56_bc47	EBV_Akata_lat_cDNA_bc23	EBV_Akata_10m_cDNA_bc22	EBV_Akata_90m_cDNA_bc21	EBV_Akata_4h_dCDNA_bc20	EBV_Akata_8h_cDNA_bc19	EBV_Akata_12h_dCDNA_bc18	EBV_Akata_24h_dCDNA_bc17	EBV_Akata_48h_dCDNA_bc16	EBV_Akata_72h_cDNA_bc24	inSample	.
273	359	+	GT/AG	PREV	0	0	0	0	0	0	2	0	0	0	0	0	0	0	0	0	0	0	0	1	86
459	539	+	GT/AG	PREV	0	0	0	0	0	0	0	0	2	0	0	0	0	0	0	0	0	0	0	1	80
789	870	+	GT/AG	PREV	0	0	0	0	0	0	0	2	2	0	0	0	0	0	0	0	0	0	0	2	81
952	1025	+	GT/AG	PREV	0	0	0	0	0	0	2	3	2	0	0	0	0	0	0	0	0	0	0	3	73
1197	1279	+	GT/AG	PREV	0	0	0	2	0	0	7	12	4	0	0	0	0	0	0	0	0	0	0	4	82
1496	1573	+	GT/AG	PREV	0	0	0	2	0	0	4	10	4	0	0	0	0	0	0	0	0	0	0	4	77
1496	5407	+	GT/AG	PREV	0	0	0	0	0	0	0	2	0	0	0	0	0	0	0	0	0	0	0	1	3911
1500	1573	+	GT/AG	NEW	0	0	0	0	0	0	2	0	0	0	0	0	0	0	0	0	0	0	0	1	73
1683	5407	+	GT/AG	PREV	0	0	0	2	9	0	14	10	4	0	0	0	0	0	0	0	0	0	0	5	3724
1683	3269	+	GT/AG	PREV	0	0	0	0	0	0	0	7	2	0	0	0	0	0	0	0	0	0	0	2	1586
1799	3269	+	GT/AG	PREV	0	0	0	0	0	0	2	0	0	0	0	0	0	0	0	0	0	0	0	1	1470
1799	5407	+	GT/AG	PREV	0	0	0	0	0	0	9	3	0	0	0	0	0	0	0	0	0	0	0	2	3608
3503	5407	+	GT/AG	PREV	0	0	0	0	0	0	0	3	0	0	0	0	0	0	0	0	0	0	0	1	1904
3843	5407	+	GT/AG	PREV	0	0	0	0	0	0	3	3	0	0	0	0	0	0	0	0	0	0	0	2	1564
4223	5407	+	GT/AG	PREV	0	0	0	0	0	0	3	0	0	0	0	0	0	0	0	0	0	0	0	1	1184
29882	32888	+	GT/AG	NEW	0	0	0	0	0	0	0	2	0	0	0	0	0	0	0	0	0	0	0	1	3006
32955	41945	+	GT/AG	NEW	0	0	0	0	0	0	3	4	0	0	0	0	0	0	0	0	3	0	0	3	8990
35410	41945	+	GT/AG	NEW	0	0	0	0	0	0	2	0	0	0	0	0	0	0	0	0	0	0	0	1	6535
35616	41945	+	GT/AG	NEW	0	0	0	0	0	0	2	0	0	0	0	0	0	0	0	0	0	0	0	1	6329
38187	38440	-	GC/AG	NEW	0	0	0	0	0	0	0	0	0	0	0	0	0	0	0	2	0	0	0	1	253
38197	38321	+	GT/AG	NEW	0	0	0	0	0	0	0	0	0	0	0	0	0	2	0	2	5	0	0	3	124
38197	38446	+	GT/AG	NEW	0	0	0	0	0	0	0	0	0	0	0	0	0	0	0	11	5	5	0	3	249
38197	38571	+	GT/AG	NEW	0	0	0	0	0	0	0	0	0	0	0	0	0	0	0	7	6	8	0	3	374
38197	38696	+	GT/AG	NEW	0	0	0	0	0	0	0	0	0	0	0	0	0	0	0	5	2	0	0	2	499
38197	38946	+	GT/AG	NEW	0	0	0	0	0	0	0	0	0	0	0	0	0	0	0	2	3	0	0	2	749
38197	38452	+	GT/AG	NEW	0	0	0	0	0	0	0	0	0	0	0	0	0	0	0	0	2	0	0	1	255
38307	38554	-	GT/AG	NEW	0	0	0	0	0	0	0	0	0	0	0	0	0	0	0	2	0	0	0	1	247
38307	38679	-	GT/AG	NEW	0	0	0	0	0	0	0	0	0	0	0	0	0	0	0	3	2	4	0	3	372
38307	38429	-	GT/AG	NEW	0	0	0	0	0	0	0	0	0	0	0	0	0	0	0	0	3	0	0	1	122
38432	38554	-	GT/AG	NEW	0	0	0	0	0	0	0	0	0	0	0	0	0	0	0	0	0	2	0	1	122
38547	38929	-	GT/AG	NEW	0	0	0	0	0	0	0	0	0	0	0	0	0	0	0	0	0	2	0	1	382
40094	89469	-	GT/AG	PREV	0	0	0	0	0	0	2	0	0	0	0	0	0	0	0	0	0	0	0	1	49375
40713	41945	+	GT/AG	NEW	0	0	0	0	0	0	4	4	0	0	0	0	0	0	0	0	0	0	0	2	1232
41507	41945	+	GT/AG	PREV	0	3	14	4	122	3	145	48	21	5	0	0	0	8	22	22	18	9	6	15	438
41528	41945	+	GT/AG	PREV	0	0	0	0	0	0	2	0	0	0	0	0	0	0	0	0	0	0	0	1	417
41587	41945	+	GT/AG	NEW	0	0	4	0	0	0	5	0	0	0	0	0	0	0	0	0	0	0	0	2	358
41595	41945	+	GT/AG	NEW	0	0	2	0	5	0	23	12	5	0	0	0	0	0	0	0	0	0	0	5	350
41606	41945	+	GT/AG	PREV	0	0	4	0	10	0	51	23	8	0	0	0	0	0	0	0	0	0	0	5	339
41681	41945	+	GT/AG	NEW	0	0	0	0	0	2	0	0	0	0	0	0	0	0	0	0	0	0	0	1	264
41690	41945	+	GT/AG	PREV	2	14	76	7	163	23	596	138	50	9	0	0	0	0	0	7	5	2	0	13	255
41694	41945	+	GT/AG	NEW	0	0	4	0	0	0	0	0	0	0	0	0	0	0	0	0	0	0	0	1	251
50073	55091	+	GT/AG	PREV	0	0	0	0	2	0	0	0	2	0	0	0	0	0	0	3	3	0	0	4	5018
55264	79617	+	GT/AG	PREV	0	0	0	0	0	0	2	0	0	0	0	0	0	0	0	0	0	0	0	1	24353
71651	71760	-	GT/AG	NEW	0	0	0	0	0	0	5	0	0	0	0	0	0	0	0	0	0	0	0	1	109
71653	71760	-	GT/AG	NEW	0	0	2	2	10	0	15	6	6	0	0	0	0	2	2	0	0	0	0	8	107
71655	71760	-	GT/AG	PREV	0	0	6	8	74	0	50	42	20	0	0	3	0	8	11	16	7	10	2	13	105
71655	79167	-	GT/AG	PREV	0	0	2	0	2	0	18	7	11	0	0	0	0	0	0	0	0	0	0	5	7512
71655	89469	-	GT/AG	PREV	0	0	0	0	0	0	3	2	2	0	0	0	0	0	0	0	0	0	0	3	17814
71655	89262	-	GT/AG	PREV	0	0	0	0	0	0	2	0	0	0	0	0	0	0	0	0	0	0	0	1	17607
76728	79617	+	GT/AG	NEW	0	0	0	0	0	0	2	0	0	0	0	0	0	0	0	0	0	0	0	1	2889
77361	79167	-	GT/AG	PREV	0	0	0	0	2	0	4	11	4	0	0	0	0	0	0	0	0	3	2	6	1806
77361	78032	-	GT/AG	PREV	0	0	0	0	0	0	2	0	0	0	0	0	0	0	0	0	0	0	0	1	671
77407	79167	-	GT/AG	NEW	0	0	2	0	0	0	7	2	0	0	0	0	0	0	0	0	0	2	0	4	1760
77575	79167	-	GT/AG	PREV	0	0	0	0	0	0	2	0	0	0	0	0	0	0	0	0	0	0	0	1	1592
77579	79161	+	GT/AG	NEW	0	0	0	0	0	0	3	0	0	0	0	0	0	0	0	0	0	0	0	1	1582
77595	79167	-	GT/AG	PREV	0	5	18	4	21	3	159	220	36	0	0	3	5	6	4	5	26	33	23	16	1572
77595	78032	-	GT/AG	PREV	0	0	7	4	8	3	167	150	119	0	0	3	0	0	6	18	37	31	13	13	437
77595	89262	-	GT/AG	PREV	0	0	0	0	2	0	18	3	0	0	0	0	0	0	0	0	2	3	2	6	11667
77595	89469	-	GT/AG	PREV	0	0	0	0	0	0	11	9	0	0	0	0	0	0	0	0	0	6	3	4	11874
77595	89220	-	GT/AG	PREV	0	0	0	0	0	0	4	0	0	0	0	0	0	0	0	0	0	0	0	1	11625
77595	83288	-	GT/AG	PREV	0	0	0	0	0	0	2	0	0	0	0	0	0	0	0	0	0	0	0	1	5693
77595	78757	-	GT/AG	NEW	0	0	0	0	0	0	0	2	0	0	0	0	0	0	0	0	0	0	0	1	1162
78195	79167	-	GT/AG	PREV	0	0	0	0	0	0	0	2	0	0	0	0	0	0	0	0	0	0	0	1	972
78603	79167	-	GT/AG	NEW	0	0	0	0	0	0	0	0	2	0	0	0	0	0	0	0	0	0	0	1	564
79333	89469	-	GT/AG	NEW	0	0	0	0	0	0	2	0	0	0	0	0	0	0	0	0	0	0	0	1	10136
79333	86715	-	GT/AG	NEW	0	0	0	0	0	0	0	2	0	0	0	0	0	0	0	0	0	0	0	1	7382
84446	89262	-	GT/AG	PREV	0	0	0	0	0	0	3	0	0	0	0	0	0	0	0	0	0	0	0	1	4816
86999	89262	-	GT/AG	PREV	0	0	0	0	0	0	10	4	0	0	0	0	0	0	0	0	0	4	0	3	2263
86999	89220	-	GT/AG	PREV	0	0	0	0	0	0	9	0	0	0	0	0	0	0	0	0	0	0	0	1	2221
86999	89469	-	GT/AG	PREV	0	0	0	0	0	0	0	0	0	0	0	0	0	0	0	0	0	0	2	1	2470
89713	89797	-	GT/AG	PREV	0	2	3	24	85	2	58	21	6	0	0	0	2	32	24	17	12	6	3	15	84
89713	90053	-	GT/AG	PREV	0	0	3	0	7	0	56	22	7	0	0	0	0	0	0	3	18	6	0	8	340
89713	89793	-	GT/AG	NEW	0	0	0	7	11	0	4	3	0	0	0	0	0	0	2	0	0	0	0	5	80
89713	89802	-	GT/AG	NEW	0	0	0	2	5	0	8	0	0	0	0	0	0	0	0	0	0	0	0	3	89
89903	90053	-	GT/AG	PREV	0	0	4	34	101	3	70	23	8	0	0	0	0	31	22	18	14	6	3	13	150
90353	92324	-	GT/AG	PREV	0	0	0	0	0	0	2	2	0	0	0	0	0	0	0	0	0	2	0	3	1971
90353	91321	-	GT/AG	PREV	0	0	0	0	0	0	0	2	0	0	0	0	0	0	0	0	0	0	0	1	968
90353	112974	-	GT/AG	PREV	0	0	0	0	0	0	0	2	0	0	0	0	0	0	0	0	0	0	0	1	22621
92585	93524	-	GT/AG	PREV	0	0	3	15	34	0	28	4	5	0	0	0	0	3	0	0	3	0	0	8	939
92585	95069	-	GT/AG	NEW	0	0	0	0	0	0	2	0	0	0	0	0	0	0	0	0	0	0	0	1	2484
94296	95287	-	GT/AG	NEW	0	0	0	0	0	0	0	0	0	0	0	0	0	0	0	0	2	0	0	1	991
94523	94779	-	GT/AG	NEW	0	0	0	0	0	0	8	4	0	0	0	0	0	0	0	0	0	0	0	2	256
104654	104781	-	GT/AG	PREV	0	0	4	8	86	3	62	23	12	3	0	0	0	5	25	9	8	6	0	13	127
104658	104790	+	GT/AG	NEW	0	0	0	0	9	0	5	0	0	0	0	0	0	0	2	0	0	0	0	3	132
105909	119178	-	GT/AG	NEW	0	0	0	0	0	0	2	0	0	0	0	0	0	0	0	0	0	0	0	1	13269
108788	116477	+	GT/AG	PREV	0	0	2	0	0	0	6	6	0	0	0	0	0	0	0	0	0	0	0	3	7689
108788	112774	+	GT/AG	PREV	0	0	0	0	2	0	5	7	0	0	0	0	0	0	0	0	0	0	0	3	3986
108788	109452	+	GT/AG	PREV	0	0	0	0	0	0	14	4	5	2	0	0	0	0	0	0	0	0	0	4	664
109793	112489	+	GT/AG	PREV	0	0	2	0	0	0	3	0	0	0	0	0	0	0	0	0	0	0	0	2	2696
109793	111810	+	GT/AG	PREV	0	0	0	0	0	0	3	0	0	0	0	0	0	0	0	0	0	0	0	1	2017
109793	112808	+	GT/AG	NEW	0	0	0	0	0	0	0	0	3	0	0	0	0	0	0	0	0	0	0	1	3015
109860	112974	-	GT/AG	PREV	0	0	0	0	0	0	0	2	0	0	0	0	0	0	0	0	0	0	0	1	3114
109860	119178	-	GT/AG	PREV	0	0	0	0	0	0	0	3	0	0	0	0	0	0	0	0	0	0	0	1	9318
113140	116477	+	GT/AG	PREV	0	0	5	0	7	0	41	22	12	0	0	0	0	0	0	0	0	2	0	6	3337
114172	116477	+	GT/AG	PREV	0	0	0	0	0	0	2	0	0	0	0	0	0	0	0	0	0	0	0	1	2305
115928	116477	+	GT/AG	PREV	0	0	0	0	0	0	3	2	0	0	0	0	0	0	0	0	0	0	0	2	549
116061	116477	+	GT/AG	PREV	0	0	0	0	0	0	0	2	0	0	0	0	0	0	0	0	0	0	0	1	416
116176	116477	+	GT/AG	PREV	0	0	0	0	0	0	10	5	0	0	0	0	0	0	0	0	0	0	0	2	301
116401	116477	+	GT/AG	PREV	0	0	0	0	0	0	5	3	2	0	0	0	0	0	0	0	0	0	2	4	76
116676	123580	+	GT/AG	NEW	0	0	0	0	0	0	0	3	0	0	0	0	0	0	0	0	0	0	0	1	6904
117723	119178	-	GT/AG	PREV	0	0	0	0	2	0	3	9	5	0	0	0	3	0	0	0	2	3	3	8	1455
117878	119008	+	GT/AG	NEW	0	0	0	0	0	0	3	2	0	0	0	0	0	0	0	0	0	2	0	3	1130
117890	119020	+	GT/AG	NEW	0	0	0	0	0	0	2	0	0	0	0	0	0	0	0	0	0	0	0	1	1130
117890	118874	+	GT/AG	NEW	0	0	0	0	0	0	4	0	0	0	0	0	0	0	0	0	0	0	0	1	984
118121	118172	+	GT/AG	NEW	0	0	0	0	0	0	0	2	0	0	0	0	0	0	0	0	0	0	0	1	51
118559	119178	-	GT/AG	NEW	0	0	0	0	0	0	0	2	0	0	0	0	0	0	0	0	0	0	0	1	619
118771	118878	-	GT/AG	NEW	0	0	0	0	0	0	5	0	0	0	0	0	0	0	0	0	0	0	0	1	107
123706	130788	+	GT/AG	PREV	0	0	0	0	0	0	0	2	0	0	0	0	0	0	0	0	0	0	0	1	7082
123706	124502	+	GT/AG	PREV	0	0	0	0	0	0	0	0	0	0	0	0	0	0	0	0	3	0	0	1	796
128532	130335	-	GT/AG	PREV	0	0	2	0	0	0	4	0	0	0	0	0	0	0	0	0	0	0	0	2	1803
129399	130335	-	GT/AG	PREV	0	0	0	0	0	0	0	0	2	0	0	0	0	0	0	0	0	0	0	1	936
129558	130335	-	GT/AG	PREV	0	0	4	0	2	0	14	22	20	0	0	0	0	0	0	0	2	7	2	8	777
129558	130656	-	GT/AG	PREV	0	0	0	0	0	0	7	5	5	0	0	0	0	0	0	0	0	0	2	4	1098
129564	130344	+	GT/AG	NEW	0	0	0	0	0	0	0	2	0	0	0	0	0	0	0	0	0	0	0	1	780
129569	130344	+	GT/AG	NEW	0	0	0	0	0	0	2	0	0	0	0	0	0	0	0	0	0	0	0	1	775
130845	131495	-	GT/AG	PREV	0	0	0	0	0	0	3	0	0	0	0	0	0	0	0	0	0	0	0	1	650
130845	137032	-	GT/AG	PREV	0	0	0	0	0	0	5	3	4	0	0	0	0	0	0	0	0	0	0	3	6187
131000	132053	+	GT/AG	PREV	0	0	0	0	0	0	0	5	0	0	0	0	0	0	0	0	0	0	0	1	1053
137049	137098	+	GT/AG	NEW	0	0	0	0	6	0	61	9	0	0	0	0	0	0	0	0	7	3	0	5	49
137049	137101	+	GT/AG	NEW	0	0	0	0	0	0	4	0	0	0	0	0	0	0	0	0	0	0	0	1	52
138027	149125	+	GT/AG	NEW	0	0	0	0	2	0	2	0	0	0	0	0	0	0	0	0	0	0	0	2	11098
138027	145775	+	GT/AG	NEW	0	0	0	0	0	0	0	0	3	0	0	0	0	0	0	0	0	0	0	1	7748
138032	145775	+	GT/AG	NEW	9	11	43	19	61	4	127	67	29	0	0	0	0	0	0	0	0	0	0	9	7743
138032	138992	+	GT/AG	NEW	0	0	2	0	4	0	4	0	0	0	0	0	0	0	0	0	0	0	0	3	960
138032	149125	+	GT/AG	NEW	2	0	7	3	12	0	20	19	4	0	0	0	0	0	0	0	0	0	0	7	11093
138032	140103	+	GT/AG	NEW	0	0	0	0	3	0	2	3	0	0	0	0	0	0	0	0	0	0	0	3	2071
139099	145775	+	GT/AG	NEW	0	0	2	0	4	0	3	0	0	0	0	0	0	0	0	0	0	0	0	3	6676
140238	145775	+	GT/AG	NEW	0	0	0	0	3	0	2	3	0	0	0	0	0	0	0	0	0	0	0	3	5537
142830	209894	+	GT/AG	NEW	0	0	0	0	0	0	0	0	0	0	0	0	0	2	0	2	0	0	0	2	67064
142830	210775	+	GT/AG	NEW	0	0	0	0	0	0	0	0	0	0	0	0	0	0	2	0	0	0	0	1	67945
142830	210894	+	GT/AG	NEW	0	0	0	0	0	0	0	0	0	0	0	0	0	0	0	2	3	3	0	3	68064
142830	210144	+	GT/AG	NEW	0	0	0	0	0	0	0	0	0	0	0	0	0	0	0	5	2	0	0	2	67314
142830	209644	+	GT/AG	NEW	0	0	0	0	0	0	0	0	0	0	0	0	0	0	0	2	0	0	0	1	66814
142830	210519	+	GT/AG	NEW	0	0	0	0	0	0	0	0	0	0	0	0	0	0	0	3	3	3	0	3	67689
142830	210769	+	GT/AG	NEW	0	0	0	0	0	0	0	0	0	0	0	0	0	0	0	2	0	5	0	2	67939
142830	209499	+	GT/AG	NEW	0	0	0	0	0	0	0	0	0	0	0	0	0	0	0	5	2	2	0	3	66669
142830	210644	+	GT/AG	NEW	0	0	0	0	0	0	0	0	0	0	0	0	0	0	0	5	0	2	0	2	67814
142830	210650	+	GT/AG	NEW	0	0	0	0	0	0	0	0	0	0	0	0	0	0	0	2	0	2	0	2	67820
142830	210394	+	GT/AG	NEW	0	0	0	0	0	0	0	0	0	0	0	0	0	0	0	3	0	0	0	1	67564
142830	209900	+	GT/AG	NEW	0	0	0	0	0	0	0	0	0	0	0	0	0	0	0	0	2	0	0	1	67070
142830	210150	+	GT/AG	NEW	0	0	0	0	0	0	0	0	0	0	0	0	0	0	0	0	0	2	0	1	67320
142836	210775	+	GT/AG	NEW	0	0	0	0	0	0	0	0	0	0	0	0	2	2	0	8	3	5	0	5	67939
142836	210900	+	GT/AG	NEW	0	0	0	0	0	0	0	0	0	0	0	0	2	0	3	4	2	0	0	4	68064
142836	210275	+	GT/AG	NEW	0	0	0	0	0	0	0	0	0	0	0	0	0	2	0	3	2	0	0	3	67439
142836	210525	+	GT/AG	NEW	0	0	0	0	0	0	0	0	0	0	0	0	0	2	0	5	3	0	0	3	67689
142836	210650	+	GT/AG	NEW	0	0	0	0	0	0	0	0	0	0	0	0	0	0	2	2	2	4	0	4	67814
142836	210894	+	GT/AG	NEW	0	0	0	0	0	0	0	0	0	0	0	0	0	0	0	3	0	2	0	2	68058
142836	209900	+	GT/AG	NEW	0	0	0	0	0	0	0	0	0	0	0	0	0	0	0	2	0	0	0	1	67064
142836	210400	+	GT/AG	NEW	0	0	0	0	0	0	0	0	0	0	0	0	0	0	0	2	3	0	0	2	67564
142836	210769	+	GT/AG	NEW	0	0	0	0	0	0	0	0	0	0	0	0	0	0	0	0	3	0	0	1	67933
142836	210150	+	GT/AG	NEW	0	0	0	0	0	0	0	0	0	0	0	0	0	0	0	0	2	0	0	1	67314
142836	210025	+	GT/AG	NEW	0	0	0	0	0	0	0	0	0	0	0	0	0	0	0	0	0	2	0	1	67189
142836	210269	+	GT/AG	NEW	0	0	0	0	0	0	0	0	0	0	0	0	0	0	0	0	0	2	0	1	67433
142836	210394	+	GT/AG	NEW	0	0	0	0	0	0	0	0	0	0	0	0	0	0	0	0	0	2	0	1	67558
142836	210519	+	GT/AG	NEW	0	0	0	0	0	0	0	0	0	0	0	0	0	0	0	0	0	2	0	1	67683
142841	209513	-	GT/AG	NEW	0	0	0	0	0	0	0	0	0	0	0	0	0	4	5	17	11	6	2	6	66672
142841	209510	-	GT/AG	NEW	0	0	0	0	0	0	0	0	0	0	0	0	0	0	0	2	0	0	0	1	66669
142859	211504	+	GT/AG	NEW	0	0	0	0	0	0	0	0	0	0	0	0	0	0	0	0	2	0	0	1	68645
143280	213268	+	GT/AG	NEW	0	0	0	0	0	0	5	3	0	0	0	0	0	0	0	0	0	0	0	2	69988
144336	145775	+	GT/AG	PREV	0	0	0	0	0	0	0	2	0	0	0	0	0	0	0	0	0	0	0	1	1439
145878	149125	+	GT/AG	PREV	9	13	48	22	67	5	135	74	37	0	0	0	0	0	0	0	0	0	0	9	3247
148853	149095	-	GT/AG	PREV	0	0	0	0	0	0	2	0	0	0	0	0	0	0	0	0	0	0	0	1	242
149258	149467	+	GT/AG	PREV	2	7	18	11	29	3	45	20	10	0	0	0	0	0	0	0	0	0	0	9	209
149258	149781	+	GT/AG	PREV	0	0	0	0	0	0	0	2	0	0	0	0	0	0	0	0	0	0	0	1	523
149606	149781	+	GT/AG	NEW	0	0	0	0	0	0	2	0	0	0	0	0	0	0	0	0	0	0	0	1	175
149623	149791	+	GT/AG	NEW	0	2	0	0	0	0	0	0	0	0	0	0	0	0	0	0	0	0	0	1	168
149623	149781	+	GT/AG	PREV	10	10	51	25	73	5	140	87	39	0	0	0	0	0	0	0	2	0	0	10	158
149889	154808	+	GC/AG	NEW	0	2	0	0	0	0	0	0	0	0	0	0	0	0	0	0	0	0	0	1	4919
149894	154808	+	GT/AG	PREV	9	8	48	25	74	5	141	84	40	0	0	0	0	0	0	0	2	0	0	10	4914
149894	158166	+	GT/AG	PREV	0	0	0	0	2	0	0	0	0	0	0	0	0	0	0	0	0	0	0	1	8272
149894	159322	+	GT/AG	PREV	0	0	0	0	0	0	0	2	0	0	0	0	0	0	0	0	0	0	0	1	9428
149894	154816	+	GT/AG	NEW	0	0	0	0	0	0	0	0	3	0	0	0	0	0	0	0	0	0	0	1	4922
151761	154808	+	GT/AG	PREV	0	0	0	0	0	0	3	0	0	0	0	0	0	0	0	0	0	0	0	1	3047
151761	156068	+	GT/AG	PREV	0	0	0	0	0	0	3	0	0	0	0	0	0	0	0	0	0	0	0	1	4307
153071	159322	+	GT/AG	PREV	0	0	0	0	2	0	0	0	0	0	0	0	0	0	0	0	0	0	0	1	6251
153071	158166	+	GT/AG	PREV	0	0	0	0	0	0	2	0	0	0	0	0	0	0	0	0	0	0	0	1	5095
154892	156068	+	GT/AG	PREV	0	0	7	2	12	0	8	7	4	0	0	0	0	0	0	0	0	0	0	6	1176
154892	156186	+	GT/AG	NEW	0	0	0	0	0	0	3	0	0	0	0	0	0	0	0	0	0	0	0	1	1294
154892	159322	+	GT/AG	PREV	0	0	0	0	0	0	2	0	0	0	0	0	0	0	0	0	0	0	0	1	4430
155091	155173	+	GT/AG	NEW	0	2	3	0	3	0	8	6	2	0	0	0	0	0	0	0	0	0	0	6	82
155091	156068	+	GT/AG	PREV	0	0	3	0	2	0	2	0	3	0	0	0	0	0	0	0	0	0	0	4	977
155381	156068	+	GT/AG	NEW	0	0	0	0	0	0	3	0	0	0	0	0	0	0	0	0	0	0	0	1	687
155756	156068	+	GT/AG	PREV	0	0	2	0	2	0	0	2	0	0	0	0	0	0	0	0	0	0	0	3	312
155756	155862	+	GT/AG	PREV	0	0	0	0	0	0	2	0	0	0	0	0	0	0	0	0	0	0	0	1	106
156280	156387	+	GT/AG	PREV	6	11	28	23	61	4	132	76	39	0	0	0	0	0	0	0	0	0	0	9	107
156280	159322	+	GT/AG	PREV	0	0	0	0	0	0	4	0	0	0	0	0	0	0	0	0	0	0	0	1	3042
156284	156387	+	GT/AG	NEW	2	0	3	4	14	0	21	11	8	0	0	0	0	0	0	0	0	0	0	7	103
156471	158166	+	GT/AG	PREV	8	10	34	26	72	6	151	88	44	0	0	0	0	0	0	2	0	2	0	11	1695
157461	158166	+	GT/AG	PREV	0	0	0	0	0	0	0	2	0	0	0	0	0	0	0	0	0	0	0	1	705
157777	158166	+	GT/AG	PREV	0	0	0	0	0	0	2	0	0	0	0	0	0	0	0	0	0	0	0	1	389
158294	159322	+	GT/AG	PREV	0	2	3	3	8	0	11	5	0	0	0	0	0	0	0	2	0	0	0	7	1028
158426	159322	+	GT/AG	PREV	0	0	0	0	2	0	10	4	0	0	0	0	0	0	0	0	0	0	0	3	896
158918	159322	+	GT/AG	PREV	0	0	0	0	0	0	3	0	0	0	0	0	0	0	0	0	0	0	0	1	404
159152	159322	+	GT/AG	PREV	0	0	0	0	3	0	4	4	6	0	0	0	0	0	0	0	0	0	0	4	170
159461	165604	+	GT/AG	PREV	0	0	0	0	0	0	4	6	2	0	0	0	0	0	0	0	0	0	0	3	6143
159461	165606	+	GT/AG	NEW	0	0	0	0	0	0	2	0	0	0	0	0	0	0	0	0	0	0	0	1	6145
166000	172348	+	GT/AG	NEW	0	0	0	2	0	0	0	5	2	0	0	0	0	0	0	0	0	0	0	3	6348
166000	171380	+	GT/AG	NEW	0	0	0	0	2	0	5	4	3	0	0	0	0	0	0	0	0	0	0	4	5380
166000	172602	+	GT/AG	NEW	0	0	0	0	0	0	2	0	0	0	0	0	0	0	0	0	0	0	0	1	6602
166000	172896	+	GT/AG	NEW	0	0	0	0	0	0	0	2	0	0	0	0	0	0	0	0	0	0	0	1	6896
166601	168080	-	GT/AG	PREV	0	0	0	0	0	0	2	0	0	0	0	0	0	0	0	0	0	0	0	1	1479
167998	168080	-	GT/AG	NEW	0	0	0	0	0	0	2	0	0	0	0	0	0	0	0	0	0	0	0	1	82
168004	168080	-	GT/AG	PREV	0	0	2	0	4	2	14	27	17	0	0	0	0	0	0	2	6	5	0	9	76
168168	168245	-	GT/AG	PREV	0	0	0	0	2	0	0	3	0	0	0	0	0	0	0	0	0	0	0	2	77
171596	171682	+	GT/AG	NEW	0	0	0	0	2	0	3	2	0	0	0	0	0	0	0	0	0	0	0	3	86
171596	172348	+	GT/AG	NEW	0	0	0	0	0	0	2	3	0	0	0	0	0	0	0	0	0	0	0	2	752
171782	171862	+	GT/AG	NEW	0	0	0	0	0	0	0	0	2	0	0	0	0	0	0	0	0	0	0	1	80
172112	172193	+	GT/AG	NEW	0	0	0	0	0	0	0	2	2	0	0	0	0	0	0	0	0	0	0	2	81
172275	172348	+	GT/AG	NEW	0	0	0	0	0	0	3	3	2	0	0	0	0	0	0	0	0	0	0	3	73
172520	172602	+	GT/AG	NEW	0	0	0	2	2	0	9	12	5	0	0	0	0	0	0	0	0	0	0	5	82
172819	172896	+	GT/AG	NEW	0	0	0	2	0	0	7	13	5	0	0	0	0	0	0	0	2	0	0	5	77
172819	176730	+	GT/AG	NEW	0	0	0	0	0	0	0	2	0	0	0	0	0	0	0	0	0	0	0	1	3911
172823	172896	+	GT/AG	NEW	0	0	0	0	0	0	2	0	0	0	0	0	0	0	0	0	0	0	0	1	73
173006	176730	+	GT/AG	NEW	0	0	0	2	10	0	22	19	6	0	0	0	0	0	0	0	3	0	0	6	3724
173006	174592	+	GT/AG	NEW	0	0	0	0	0	0	0	8	3	0	0	0	0	0	0	0	0	0	0	2	1586
173122	174592	+	GT/AG	NEW	0	0	0	0	0	0	2	0	0	0	0	0	0	0	0	0	0	0	0	1	1470
173122	176730	+	GT/AG	NEW	0	0	0	0	0	0	9	3	0	0	0	0	0	0	0	0	0	0	0	2	3608
