# Supplementary material for: Transcriptome Profiling of Epstein-Barr Virus Using Nanopore Sequencing
Source: Research Square preprint supplement (doi:10.21203/rs.3.rs-109629/v1), 2020-11-20
Supplement: Supplementary file 7 [file cd4928f9ffb796bfb2461c4e.docx]

Transcriptome Profiling of Epstein-Barr Virus Using Nanopore Sequencing

Norbert Moldován1, Kálmán Szenthe2, Ferenc Bánáti3, Ádám Fülöp1, Zsolt Csabai1, Dóra Tombácz1, János Minárovits4, Zsolt Boldogkői1*

**Supplementary table 1. Detailed descriptive statistics of the sequencing datasets.**

**Supplementary table 2. TSSs of EBV.** TSSs were detected using the LoRTIA software. The -150–0bp region upstream from the TSS was analyzed for GC, CAAT and TATA boxes. Distances from the TSS are given in bases. The ±10bp region of the TSS was also retrieved for sequence analysis. The TSS positions from previous deep-CAGE25 and PacBio25 analyses were matched with our results. The sample number in which a given TSS was detected is shown. TSS coordinates are according to the genome of strain Akata (NCBI accession: KC207813.1)

**Supplementary table 3. TESs of EBV.** TESs were detected using the LoRTIA software. The -50–0bp region upstream from the TES was analyzed for PASs. Distances from the TES are in bases. The ±50bp region of the TES was also retrieved for sequence analysis. The TES positions from previous PE-seq experiment was matched with our results. The sample number in which a given TES was detected is shown. TES coordinates are according to the genome of strain Akata (NCBI accession: KC207813.1).

**Supplementary table 4. Transcripts of EBV.** The transcripts were annotated using the LoRTIA software. The transcript coordinates are according to the genome of strain Akata (NCBI accession: KC207813.1).

**Supplementary table 5. Putative transcripts of EBV.** Unique very long reads were named putative transcripts, because of their uncertain TSS position. Transcript coordinates are according to the genome of strain Akata (NCBI accession: KC207813.1).

**Supplementary table 6. The introns of EBV.** The introns were detected using the LoRTIA software. Read counts per sample are shown. Splice junction coordinates are according to the genome of strain Akata (NCBI accession: KC207813.1)

**Supplementary table 7. Coding potential and BLAST analysis of alternatively spliced transcripts.** For the analysis of the coding potential we used the CPAT tool.
