# Supplementary material for: Transcriptome Profiling of Epstein-Barr Virus Using Nanopore Sequencing
Source: Research Square preprint supplement (doi:10.21203/rs.3.rs-109629/v1), 2020-11-20
Supplement: Supplementary file 9 [file 8774f26d5e78a8dd4072d0ef.xlsx]

## Sheet: Sheet1
Position	Strand	PAS distance	PAS seq.	TES seq.	PacBio	PA-seq	Sample count
5866	+	23	AATAAA	ACCTGTGTGCTGTATTTACAAACACTACAATAAACCCAATGTGCAAATGTGGTTTGTATGGCTACTTTGTGTTCCTAAAAAATGCAACAATAGAAGTGGAA	PacBio	YES	10
10026	-	18	AATAAA	GCTTTAATTGTCATGTATGCTTCTATGTAGTTAATAAAAATGTCAAATTCACTCATGGCTTTGTAAATTCCTTTTTCCTGCAGCTTGTTAAAGGCATTTTT	PacBio	YES	3
10174	+	17	AATGAA	CCCAACCCCCCCTTTCGACTGTCATTTACAATAAAATGAAACCTTTTATTCTTGATTGCTTCTTGTGTTCTTGCCGCCCAGGTACCTTCCTGTGTTCTCCC	PacBio		2
37642	+	27	AATAAA	CTCTCCAGCAAACAATGTATCCCAAATAAATGTTACTTCTTTTGCTCTTAACCATTGACACGCCTGTCATTCTATCAATTAAACAAGGGAAAAGGTTTAGC	PacBio		1
37908	-	21	AATAAA	CACAATTAGGCTAAAAGCAGCCATGTATCAATAAACTGTTTAAACTAACAATTCTATGTGTTGTGTGTGGTTTTGGGTTGGGACTGGGGTAAAAGTGGGAG	PacBio	YES	16
43152	+	24	AATAAA	TAACAATGTTTGCTTATTTTCATGTTCAATAAATGCTATGTTAATGATGAAGAACCTGTGTTGTTCTTTGGAAGTGGGCCCGATGGGGTAGTAGGTTTTGG		YES	16
43580	-	24	AATAAA	TCAACTATACCCAGCTCATTTTGGAAAATAAACAGTAGTTGCTTTTAACTCTTGAAACTTGCCTCGTGTTGGATTGGCTGTCATGCTATTGGGTTAACGGG	PacBio		7
46374	+			TCTGCCTACGCGAGGCTGAACCTCCTGAATCACTGCATCTTTCTCGAGGCGTTTAAAGAAGAGAATAGTGGCCAGGGCCTCGGTGGGGTCCAGCGTGAGGT			1
48336	+			CCCATTCAGTGGATGTGGTACCGCCTGTTGGTAAACTCGTGCCTGAGGAGCGCCCACTGTCTTTTGCCTATACCTGCCGTCTCTGAGGGGGGGAGAAAGAC	PacBio		3
49663	-	19	AATAAA	ACTCAAGTTTTTGTATCTGTAATTGTTTATTAATAAAGTGCATACACCATGTTTCGTGCCCTCTACTGTTTCTTACGTGCCCCGCGCGGGGCGGTGTCTTG		YES	6
49705	+	23	AATAAA	GCACGAAACATGGTGTATGCACTTTATTAATAAACAATTACAGATACAAAAACTTGAGTCTCTCGAGGTCTGCGATGAGGCGGTGGGTGGAACGCTCCAGC		YES	13
66440	+	25	AATAAA	TACTGAACGAGCCTGTGAATCTTGCCAATAAACGTTTATTGCCATGTCCAAGTTGTTGTACGTGCGTGATCATGAGGGCTTTGCCTGCCTAACGGTCGAAA	PacBio	YES	15
69732	+	20	ATTAAA	TACTTTTTGTGAATATCTGTTGGTGACATTCATTAAATCCTAACGACCGGAGTCCTGTCTCTTTGTGTTCTTGGGGGACTTGAGTTAGCTGTCTTTCCTCT	PacBio	YES	13
70262	-	26	ATTAAA	ACTAGGACTGTTTTTTGTTCCTGGATTAAATCAATAAATGGTTAAACTGAATCTCCACCTGTGTAACCTCACTGTAATTCTATGGGAATAACAAGGGAAGA	PacBio	YES	13
75123	-	23	AATAAA	TGACACCTTCATATCCCTTGTTTTATCAATAAAATGTTTATTTGGTGTGGAGTCTGGTTGCTACGTTAACGCGAGCTCCGTGGGCCCAGAGTGCTCCGGCT		YES	8
75157	+	26	AATAAA	AACGTAGCAACCAGACTCCACACCAAATAAACATTTTATTGATAAAACAAGGGATATGAAGGTGTCATTGACCCGAGGATCCAAACCCCCTCCCCTGTCTC	PacBio		2
76939	-	28	TATAAA	TATGATGACGCCGAGACCTATGTATAAAGTCAATAAAGATTTATTAATCAGAAATTTGCACTTTCTTTGCTTCACGTCCCCGGGAGCGGGAGCGGGCACGT	PacBio	YES	13
76965	+	43	AAGAAA	GTGAAGCAAAGAAAGTGCAAATTTCTGATTAATAAATCTTTATTGACTTTATACATAGGTCTCGGCGTCATCATATGGTGGGGTGGTGTAGGTATGGGATG	PacBio	YES	16
78919	+	22	AATACA	AGAACTTGTGAAATTTCGCCATCCTCCATAATACACTCAATATCTATCTCATTACCGAGCATTTGTGTTTTTACGCTGAAATTCGAGTCTTGAGCTGACGT		YES	1
82617	-	35	AATAAA	TCTCATGGAATATGAAATAAAATCACAAACACAAGCAGGTGTGGAATTCAATATCATCAACTTTATTGTCGGGCGTATTATCAGTGGGTGGAATGGAGGGG			2
82626	+	26	AATAAA	TCCACCCACTGATAATACGCCCGACAATAAAGTTGATGATATTGAATTCCACACCTGCTTGTGTTTGTGATTTTATTTCATATTCCATGAGAGAGACCTCG	PacBio	YES	3
82634	-	18	AATAAA	CAAATATGCGAGGTCTCTCTCATGGAATATGAAATAAAATCACAAACACAAGCAGGTGTGGAATTCAATATCATCAACTTTATTGTCGGGCGTATTATCAG	PacBio		10
83165	-	34	AATAAA	CAGGTTTTGCTCAAGGAATAAACTGCCTAGGGGCCGGAGGTCCGATTGCTGAAACCAATGACAATTAATTAAGACTGGCCAAAAAATCCAAGCGAAACATC			2
85660	-			TGTCCTTCAAATGATTCCATGGTGGGTCTGAAAATATGCAAAATTTCTACCTCATCTAAAATTGTCATGACTTATCACTGCCCCCCTCCTCCCCGCAGTCT			1
86759	-			GTAGTTGTGCCTTTCGAAATGCGTTCTGGATTACATGGTCTTTTATGCCTCTCCGCGCGTGATATGGATTTTCATTAGGTGGTGCATTCCACGGGTAATAT	PacBio		4
86797	-	22	GATAAA	TCTGGGTTCACCTCCCGTTGCTAACATTGATAAACCCTGTAGTTGTGCCTTTCGAAATGCGTTCTGGATTACATGGTCTTTTATGCCTCTCCGCGCGTGAT	PacBio		2
88874	-			TGGCTCTCATTGTACATATGTCAGCAAATTTAGTACAGTTCCAGTCTCACACCATGAGTGTTCATTCCTTAAACCATGTTTATGTGTCAGTCAAAGATCAA			2
89497	-	30	AATAAA	TCGTTTACTAATGGAATATTAATAAATATCTTCCTGTTGGCTCTCTTTGAAGTGGTTGCCATGGTTTCGTTTAAGCAGGTGAGGGTGCCATTGTTTACCGC	PacBio	YES	12
93529	+	27	AATACA	TCTTAGAAAACTGTTCTGCCATGCAATACAAATAAATTTCTCTTACCTGCGTCTGTTTGTGTAGTGAGGTGTTGTGTCCTGTATGGTATTCTACTTTAAAA	PacBio	YES	9
95334	+	22	AATAAA	GCACTCCCTGTATTCACTGAGCGTCGTCTAATAAAGATGTCTATTGATCTCTTTTAGTGTGAATCATGTCTGACGAGGGGCCAGGTACAGGACCTGGAAAT	PacBio	YES	11
97225	+	29	ACTAAA	TAAAAGCCGTGTATTCCCCCGCACTAAAGAATAAATCCCCAGTAGACATCATGCGTGCTGTTGGTGTATTTCTGGCCACCTGTCTTGTCACCATTTTCGTC		YES	3
99074	+	21	AATAAA	CAATAACAACTACAATTGGCCATGGCTGTAAATAAAATGTCATAACCTGGAGTCTGCATGTCTGTTGTTTTATTCAGTAAACCAGTAGTGCGCGTGAGTTC	PacBio	YES	16
99078	-	19	AATAAA	TAAAGAACTCACGCGCACTACTGGTTTACTGAATAAAACAACAGACATGCAGACTCCAGGTTATGACATTTTATTTACAGCCATGGCCAATTGTAGTTGTT	PacBio	YES	10
103929	-	21	GATAAA	CTGGAAATGCTTGGTCAATAAAGAATCTTGATAAAACAGGTTAAATGTGAAGCCCGAGTTGGCATCTTCCTCCTTGTTTAGATCCGCGCAGTAATCCTTGG	PacBio	YES	6
103940	-	23	AATAAA	ACAGTCTGGCACTGGAAATGCTTGGTCAATAAAGAATCTTGATAAAACAGGTTAAATGTGAAGCCCGAGTTGGCATCTTCCTCCTTGTTTAGATCCGCGCA			9
104070	+	19	AATAAA	GGAGTGACACGGTCTCAAAAATAATTCCCTAGAATAAACTGAGAACAGTCATCAGTAAATCTGTCTCTCGAGTGATTTCCATAGGCATGGCGTAGCCGGGG	PacBio	YES	3
107642	+	18	AATAAA	ACGGACAGCGAGGAGGAGATCTTCCCCTAATGCAATAAAAACTTAAAACACTGAGGTTACTTTCCCGTCATTCTTTCGGGGGAACGAGGGGAGGCGGGAAT	PacBio	YES	16
108013	-	17	AATAAA	GACTCTGAAAATGATGAATTGCTGTTTTTGCCAAATAAAAAACCAAACTAACATCTCTTGTAATTAATGGGTAAAGGGGGAGGCATAACAGTGGTGGGAGG	PacBio	YES	14
109426	-	17	AATACA	GCGCTATGTCTATCTCTATTGCCTCTGTAAACAAATACAAGAGTTCTCTGGTGAAACTGGCTTCTGTGACTTTGTCTCCTCGTTAGTCCAAGAGAATGACA	PacBio	YES	2
112732	-	18	AATAAA	TGTAATCTCTAAAGATTTGATTGAGATCAGAAAATAAAAAGAATGTAACACTACTTGTTTCTGGAATGCTTCTAGGCGGGCGGGCTTGTGCTTGTACTGAC	PacBio	YES	17
113147	+			AATCTCCAGCACCGTAATGTGTGCCACCTGCTTCAATAAGAATGTAAGACCTGACGTTTCAGTACTTGGCAATTGTAGAGCATAGCCCGGCTGTAAAGGTC			1
117604	-	18	AATAAA	GACCCGTCGCTTTACAAGGGACTGGTGTAGTCAATAAAGTTTAATGAACTTTCTTGAACGTGTGCTTCTGTGTTGTTGCGAGAAAATGAGCCATGACTAGC	PacBio	YES	16
117632	+	33	AAGAAA	ACACAGAAGCACACGTTCAAGAAAGTTCATTAAACTTTATTGACTACACCAGTCCCTTGTAAAGCGACGGGTCTCGCGTGACGGCATTCGTGAGCAGGGCT	PacBio	YES	9
120554	-	21	AATAAA	GGAAATAAGGTGGTTTTTTGATAATTGTCAATAAAGATGGATTTGAAAGTGGTAGTGTCTCTCTCCTCTCGTCTGTATACCGATGAGATTGCCAAGATGCA	PacBio	YES	16
128146	-	18	AATAAA	TGTTACGTTTTTCCTTTAGATGCGCAGCAGGTAATAAAGCTTGACCAGTGTGTACATTCCGGTTTCCTTCTTGACCTTGATGTACTTTCCTAGAAACTGTG	PacBio		11
128254	+	23	AATAAA	GAACCAGAAAGATACCCAGAGCAAAAGCAATAAAGTACAGGATTATTGCCAAAACAACGTGTGCTCTTTCTTCATACAGGCCCGCAATTTCCATGACAGTC	PacBio	YES	2
134450	+	19	AATAAA	TCGCACTGGAGTGGGTAATTGGCAAAAAGGTAAATAAAGTCATCGCACGGGGGTTTTGCCTCCTTCTCGTCTCTTGTTTCGGGTAGGGGAGTAAGGCCGTG	PacBio	YES	7
136999	-	21	AATAAA	CCCCTGTGAATGGACAGGTACTAACACGCAATAAAGTTTACTTTCAAGCCACGCGTTTATTCAGCAATTCCTCGCAAAAGATGGACTTGAGGTGGGCTGAC	PacBio	YES	15
137010	+	22	AATAAA	TCAAGTCCATCTTTTGCGAGGAATTGCTGAATAAACGCGTGGCTTGAAAGTAAACTTTATTGCGTGTTAGTACCTGTCCATTCACAGGGGTATCCAGCCCT	PacBio	YES	9
140239	-	18	AATAAA	ACAGGGGGAGACTTTCGGGGCATTGGTGTAACAATAAACTGGCTAAACTTACATCACGTGTATGTGGTTTTTCATGCAGCATACAGATTAGAGGGGCAGGT	PacBio	YES	13
148552	-	23	AATAAA	TAGCCTCCGAGGGCACTCTGTAAACTGAATAAAGCTGTCCTTCTGTCACAACCTCACTGTCATTCTTTTCATTAACGGGGGAAGGAAAGGCCTGCTGTCAT	PacBio	YES	13
150920	-	29	TATAAA	GCACGCTCCCATGTTTGTAACTATAAAGACAAGCCTGCGTTGCCTAAATCCTCACGACCTGTGTCTGTGTCTTATTTGTGTAGGTGCAGCTATCCTAGATA		YES	8
155766	-	25	AATAAA	CTTCTATAACCCTTTCCTAAGACCTAATAAAGGCCTTCTGAAAAAGCCTGACAAGGAGTACCTGCGTCTCATTCCCAAGTGTTTCCAGACACCAGGCGCCG	PacBio	YES	12
160071	+	24	AATAAA	TCTCCAGCCCCATGGTGTGAGACATGCAATAAAACACGCTATTGATTCTCTTCATTAAAATCTCTATGTCATTTATTAGGCACAAACTTACATCGACTTTA	PacBio	YES	13
160075	-	48	CATAAA	GGCATAAAGTCGATGTAAGTTTGTGCCTAATAAATGACATAGAGATTTTAATGAAGAGAATCAATAGCGTGTTTTATTGCATGTCTCACACCATGGGGCTG	PacBio	YES	13
163913	-	26	AATGAA	GACTGACTTCCTGAAATCTTTGTAAATGAATAAACAGTGGGTGTTGCGTGATGAGTAAAGTGTAACATTTAATGTGGGACTGGGAGGCCGGGGCGATACCT	PacBio	YES	7
165271	+	23	AATAAA	GGGGTTTATGTTTCTGGATACTTGTCGCAATAAACGCACTTGCCTATTTCACCTTGTTTTAGTGTGGCATTGGGGGGTGGCATTGCGGGTGGATAGCCTCG	PacBio	YES	5
166007	-	26	AATAAA	TATTATTGATGTGACTTGTGATGCAATAAATAAAAGTACAGATAGATGGCACTCTTACCTTCCTCTGCCCGCTTCTTCATATATGTGTTGAGATGAGTCAT	PacBio	YES	16
