# Supplementary material for: Transcriptome Profiling of Epstein-Barr Virus Using Nanopore Sequencing
Source: Research Square preprint supplement (doi:10.21203/rs.3.rs-109629/v1), 2020-11-20
Supplement: Supplementary file 10 [file a4faa731b2c8e2be4d096f3a.xlsx]

## Sheet: Sheet1
Start	Splice junction	Stop	Strand	Type
56	272, 360, 458, 540 788, 872, 951, 1026, 1196, 1280, 1495, 1574, 1682, 5408	5862	+	Putative transcript
8101		10178	+	Putative transcript
22004		23541	+	Putative transcript
23344		23923	-	Putative transcript
35308	35308, 35409, 41946, 43141	43141	+	Putative transcript
36670		38371	-	Putative transcript
43574		46677	-	Putative transcript
49665		55230	-	Putative transcript
49858	50072, 55092	56246	+	Putative transcript
61867		66440	+	Putative transcript
66327		69732	+	Putative transcript
70285	71654, 89470, 89712, 90054, 90317, 91322, 92584, 99070	99710	-	Putative transcript
92445		95325	+	Putative transcript
95285		99071	+	Putative transcript
99078		104007	-	Putative transcript
99773		104073	+	Putative transcript
102180		107642	+	Putative transcript
103929	104653, 104782, 105908, 119179	120585	-	Putative transcript
108199	108787, 109453, 109792, 116478	117632	+	Putative transcript
119561	120321, 123580, 123705, 124503	128257	+	Putative transcript
127347	127659, 130789, 130999, 132054, 132206, 133428	134452	+	Putative transcript
131881		137008	+	Putative transcript
148552		155958	-	Putative transcript
160075		164493	-	Putative transcript
166001		168820	-	Putative transcript
