# Supplementary material for: Transcriptome Profiling of Epstein-Barr Virus Using Nanopore Sequencing
Source: Research Square preprint supplement (doi:10.21203/rs.3.rs-109629/v1), 2020-11-20
Supplement: Supplementary file 11 [file bf6248d212d813150ba0f363.xlsx]

## Sheet: Sheet1
Position	Strand	GC box distance	GC box seq.	CA box distance	CA box seq.	TATA box distance	TATA box seq.	TSS seq.	Deep CAGE	PacBio	Sample count
1725	+							CGTGTAACTTGACGTGCAAGG	YES	YES	7
9558	+					33	CTATAA	AGGTAGGCCTGCACACCTTAG	YES	YES	1
10622	-							CGCCCTCCTTGGCCGAGCCGC	YES		1
37914	+							AGAATTGTTAGTTTAAACAGT	YES		3
37998	-	29	GCGGCG					CATGTTGCGGGTGCCGGCCCT	YES		1
38033	-							CCCTCCCCATGGGATGGCGGC			1
38124	-							TTGCGCCCGGCCCTGTACACT	YES		1
38141	-							CCGGGTTGGTGGCACTGTTGC	YES		3
38273	-	45	GCGGCG					CACCCGGAGCGGGGCAGCGGC			1
38313	-	61	CGGCGG					ACCTGGCGGCGGCGCAGCGGT		YES	1
38398	-	45	GCGGCG					CACCCGGAGCGGGGCAGCGGC		YES	3
38515	-	32	GCGGGG					GCGGGGCAGCGGCCCAGCGGA			1
38648	-	45	GCGGCG					CACCCGGAGCGGGGCAGCGGC			1
38773	-	45	GCGGCG					CACCCGGAGCGGGGCAGCGGC			1
38898	-	45	GCGGCG					CACCCGGAGCGGGGCAGCGGC			1
38938	-	61	CGGCGG					ACCTGGCGGCGGCGCAGCGGT			1
39435	-	64	CGGCGG					TGGCGGCGGCGCAGCGGTGTC			1
39648	-	45	GCGGCG					CACCCGGAGCGGGGCAGCGGC	YES		1
39688	-	92	GGCGGG					ACCTGGCGGCGGCGCAGCGGT	YES		1
40104	+							CTAGAAGGCAGGGGGGGGGCA	YES		1
40397	-			94	ACCAAT	30	ATAAAA	CCGGCTCGCCAGCGTCGTCCA		YES	9
40561	+							GGTACCTGGAGGTCATTCTAT	YES		1
41399	+							GGAGTTGCCTGTTTCATCACT	YES	YES	9
41553	+					32	TAAAAG	TAGCCCCTTTAGCTGCCATTT	YES	YES	4
41774	+							TGGGGCCTGTGGACACCTGAG	YES	YES	1
42024	+							TTAGCCCTGTGTATACGGGAC	YES	YES	2
42276	+							GGAGACCCAAGCCTTGGGCGC	YES	YES	1
42287	+							CCTTGGGCGCGCGTTGGCCTG	YES		1
42473	+							TGGATCCAGAAGGTTTAGCTG	YES	YES	1
42612	+							TTGGGCCTGCGGGGAACTGAG	YES		1
42980	+							GTGGGAAGATGGGACTACTAT	YES		2
44667	-							TGGCCAGAGTGGGCAAAACAA	YES		5
44736	-							GTCAGAATCTGGAACAGGGGG	YES		5
45239	-							GGACCTGCTCGGGGGGCCAGG	YES	YES	1
45727	+			93	CAATGG			GTCCATGCCCGTGATGAGGCT	YES		3
46065	-							GCCCCCTCACGAGGAGTGGCG	YES		2
46148	-							TTTGCCACCCAGATGTGTCAT	YES		2
46204	+							ACCAGTTTCTGGGACACCGCC	YES	YES	6
46473	+					27	ATAAAA	CTCGGATTGTGGCAGCCGATA	YES	YES	8
47629	+							CAGGCCCCCAGCTTCTGAGGC			1
48992	+	63	GCGGGG					AGAGCCGTTTGCTCCATCTGT	YES		18
49476	+							TCAGCGCCGTCCACGGCCGTA	YES		1
49845	+					31	GCTATA	CCGGAGCGGCGGTGGATAGAG	YES	YES	2
50043	-							GCTATCCCGCGCCTTTTCAAG	YES		1
50367	-							CCGTGCCAAAGGCCACGGGGG	YES		2
56735	-							TCTGCTGGAATTCTTAAAGGA			1
59686	-							ACCTAAATCCGGAACAGATCA	YES		3
62580	+							AGCACCGGCTGGGCCAAATCC	YES		5
63734	+							CGGGGCGGTTGCCTGTCTGGG	YES		10
66367	+					33	GCTATA	CTCAGAGGATGATCTGTTGGA	YES		10
67404	+					31	ATAAAT	CTGCTCTGGTACGTTGGCTTC	YES	YES	12
68347	+	14	GGCGGC	131	GCCAAT			GGCCGCCAGTACGGCCTCTGA	YES		2
68395	+					30	ATAAAA	ACCACTGGGCACAGGACTCCA	YES	YES	1
68471	+							ACCCCTACTTGGGAGAGTCCG			1
68674	+							AGCAGCACCTGTCCCTGGGGG	YES		1
70464	-							GAGACACGATGAAGTTGAATT			1
71850	+							GGGCTAGCTGGGATGTAGTGC	YES		1
71860	-					28	ATAAAT	AGTCAAGACAGCACTACATCC	YES	YES	7
71906	-							CTCCATCAGCGTGCCCGCCTC	YES		1
72915	-							TCTGCAACCTGGTCCTGGACC	YES	YES	7
72979	+							CTGCTCGCTCAGGCTGTTCTG	YES	YES	1
73272	+							GGGGGTATGTGGGACCCTCAT			1
73802	-							GAGCCTGGCCGCCGTCACGTC	YES		3
74451	+	14	CGGCGG					CGGGCTAAACAGAACGATGGC	YES	YES	1
74691	+							AGCCAATAGCATCACGGATCA			1
74715	+							GAAGCGCTTTGACGCCGTCCG	YES		2
75170	+							ATATGAAGGTGTCATTGACCC	YES	YES	1
76018	-					29	TATATA	CCTGTCTGTTAGATCATCACC	YES		7
76075	+	43	GCGGCG			38	GCTATA	TCTCTTTACTGCGAAATGGGG	YES		15
76427	+					28	TAAAAG	TCGGCTGTCTGTACTTCTTCT	YES		15
77222	+	29	GCGGGG			39	TAAAAG	AGAAGTGCTGGGAGGTAGATA			1
77553	-					32	ATATAA	CTCTATCAGCACACATCATGT	YES		3
77755	+							CTACTGGGGTGGGACTTGTTC	YES		1
77965	+							TTGCTGGGGTGGGGCTGGTGC	YES		1
78366	-							TCGGACATTTGACATTACTGT	YES		1
78430	+							TCCCCGAGGTGAGAGTCCATT	YES	YES	1
79539	-							AATCGGTGCCGAGACAATGGA	YES	YES	18
80787	-							CATCTCCATCGCTCTCCGCGT	YES	YES	3
82006	+							CATTAACCATGGGGCACCCGC	YES	YES	1
83559	-							ATATCTTTCTGCCGAAAGTGA	YES	YES	1
83664	-					35	GTATAT	TAACCATCCTACAAACTCAAT	YES	YES	4
85516	+							TGGGGCTGGGGGACATTGCAG			2
89499	-					27	ATAAAT	GGCTCTCTTTGAAGTGGTTGC	YES	YES	9
90600	-					28	TAAAGG	CAGGTAACTCACTAAACATTG	YES	YES	8
90633	-							CTGGTGCCTTGGCTTTAAAGG	YES		1
90734	-							CTCCTCTTTTGGAAACTATGC	YES	YES	1
90776	-							TTTTGACACCAGCTTATTTTA	YES	YES	2
92446	+					31	ATAAAT	GTAGGATCTCAGAGTAATCTC	YES		6
92643	+							AGCTTTACCTGAAACACTATC	YES	YES	6
93672	+	47	GGCGGG			32	ATATAA	ATGGGGCATTAGGCGACTCTG	YES	YES	9
93733	+	109	GGGCGG					CGGTTATTTTGGTTCCTGAAC	YES		1
96845	+							CCTTTGGAATGGCCCCTGGAC	YES	YES	7
96930	+							TCATATATTTGCTGAGGTTTT	YES	YES	1
97203	+					29	TAAAAG	CCGCACTAAAGAATAAATCCC	YES		5
97446	+							GCAACCAGCTGGTCATCAGCC	YES		8
97575	+							TTTACGGTTCATTCTCAGTGG	YES		1
97897	+							CAGGACCCCTATCACGGGGGT	YES	YES	16
98087	+							CCGTGCAAAAGGGCAAGCCCG			1
98193	+					30	TAAAAG	GCTGTGGGGTGCGAAGGCGGG	YES	YES	7
98529	+							AGTCTATCCAGGAGGAGGACG	YES		1
99689	-							GCCGTCCGCTATGGCGGAAGG	YES	YES	1
99710	-					32	ATATAA	TTCAGGCAATGCCTGGATGTG	YES	YES	5
99966	-	25	CGGCGG					TTTTAGCCACGGAGGACATTC	YES	YES	1
101176	+	75	GCGGCG					ACCCAAAGGCGCTATAGACGG	YES		4
101638	-							CCTGCCTCGAGAAGACTCCGG	YES		1
102553	+							CGGCTGCGCAGGGCCTAAAGA	YES	YES	1
102980	+							ACCCGTGGTTGATAATCAGGG	YES		1
103060	+					32	CTATAT	CCTATCTGGTGGCAGAGCTTT	YES		2
105974	-	75	GCGGGG					ACCCGAGACCGCAGACTCTTG	YES	YES	5
106279	+					31	ATAAAA	CCCGGGCCCTGACGCTCTCCG	YES		10
106310	-					27	TAAAGG	CTCAGATCTCAAACAATGATG	YES		6
106398	+					30	TAAAAG	TGAGACCATCGCAATCATGAA	YES	YES	14
106751	+	59	GCGGCG					CAGACCTCTCGGCCTGGGTCT			1
107189	+							AGGTGTGGCTGGCCTCCTTCC	YES		1
108554	+							AAGTAGTTGTGCCGTGGATTG	YES	YES	4
108566	-	43	GGGGCG					CAACATCTTCATCAATCCACG	YES		6
109409	-							TGGCTTCTGTGACTTTGTCTC	YES		1
109903	-	113	GGGGCG					ACCCTGACATGGGATTTGACC			1
110514	-	115	GGGGCG					GATTCAGATTGGGAAGGCCAC	YES	YES	1
111079	-							TGCTCGGGGTGCCTTAGAGTC	YES		1
111136	-							GAGCGCACGTGACAGATTTGG	YES		3
111352	-					32	GTATAA	TATGATCCTTGCCTAATTCTA	YES		6
111456	-					28	ATAAAA	TCTGCCTGCTGCCTCAGGAAC	YES		1
111804	+							CCTCATCTTTGTTCCAGGCCA	YES		2
112337	+							TCAGACAGGTGGGCTCACCCT	YES	YES	1
113127	-							TCTTATTGAAGCAGGTGGCAC	YES	YES	1
114165	-					27	TAAAGG	TCACCCCCGAGGAGAGGGGAT	YES	YES	9
114471	-					30	CTATAA	TCAGGGAAGCGTTCTTCACTG	YES		2
115663	-	43	CGGGGC					GCGCTATGATGCTGTAGCCAA	YES		7
115720	+					31	TAAATA	ACAGTCTTTTGTGAGTAAATA	YES	YES	2
116228	+							GGCGAGGATTGGGCTCATCCG			1
116282	-							GGGGTGGAATGTCAGACCAAG	YES		1
116611	-					28	ATAAAG	CTGGTCAGCCGAGTTCACAGA	YES		4
117791	-							TCTTTATCTTACGGTCTTCCT			1
117861	-							CTCCAAAGGGACGTCCAATGC			2
118090	-					40	CTATAA	ACACAACCACGGTGACATCCA	YES		1
118336	-					33	GCTATA	TTCTGCGTCCAGACGCGATGG	YES		9
118716	-							TGGCCGAGTTGAAAGGCGCCT	YES		2
118909	-	63	GGGGCG					GCAAGGTTTACACCCTTATCC	YES		1
118968	-							GGGTAAGGGGCGCGATTTTGG	YES		1
118993	-							TGCCGGTGGGGGCCAAGGTGC			1
119018	+							GCTGGGCAAAAAGAGTGGGTT	YES		1
119044	-							TCCTGGCCCTACTCGCCTTTG			1
119059	-							GCTGCTATTTGGCGTTCCTGG			1
119708	-							TGGCCACAGCGGCATACTCTC	YES		12
120585	-	46	GCGCCG					GTGGTTTTTTGATAATTGTCA	YES	YES	15
120850	-							GGTCAACGAGTACAGCCAGCG			1
121727	-	72	GCGGGC					GCTCGCCCATGGGCAAATACG			2
122459	-							CTGACACCCTGGCCGCGCCCC	YES	YES	4
123055	-							GGAGAGGGCCAGGCACAGGGC	YES	YES	2
124401	+							CTGCTTGCTGGGTCTCCTTCC	YES		2
124885	-							GTAAAAGGTGGCCTCCCTGCC			1
124939	-							GCAGTCATTTATTCGGATAAC	YES		7
127347	+	47	GCGGGC					TTATGATAGCAGAAGACTCCT	YES	YES	7
128517	-					28	ATAAAT	CTGTGGCTGGGGAGCCCCGCC			1
129874	-					29	CTATAT	CCCAACACGCGGCCACACAGC			1
130518	-							TTTCCGAGCCGACGCGGTGTT	YES	YES	10
130543	-					30	GTATAA	GTGTACTTAAGGAAGTCATAC	YES	YES	2
131476	+	16	GGCGGC					CCAGGTGTTCGAAGAGACCAG	YES	YES	1
131876	+							GGTCCGGCACGGCACCCTCTC	YES		4
132379	-	100	GGGCGG					ACCGGGGGGAAGGCTGCAGAG	YES	YES	2
132425	+							CATGAGCAACACGGCCAACCC	YES	YES	1
132597	+	44	GCGGCG	104	GCCAAT			AGAACGCTCCAGGTAGAGTTT	YES		2
135017	+							GGTAAAAGTTAACACTTAGGG	YES		3
135917	+					32	TAAAGG	ACCTACAAAAGCCGGACAAGG	YES		6
135941	+							TTCAGAGCCCACCACCGGCCT	YES		3
136040	+							AGGACCTCATCAGCGTCCCCC	YES		1
136188	+			113	GACCAA			TCCTGGGGCCGGAGCGGTCGC	YES		1
136242	+	38	CGGCGG					TTACTACGCCGGGCCCGCGGG	YES	YES	2
136254	+	50	CGGCGG					GCCCGCGGGCGGGGACCCGGG	YES		1
136337	+	88	GGGCGG					TTGGCTTGCCGGGCCTCTTTG	YES		1
136390	+	140	GGCGGG					TCCCACTTGCGGGCAGACTAC	YES		1
136429	+	42	GCGGGC					TCCAACAAGCGGAAAAGAGAC	YES		1
136776	+							CCACTGTGTGGCCGAGTCCAC	YES		1
136810	+							GGAGCAGCCGGGAACTCTGGA	YES		1
137006	-	77	GGCGGG					AAGTTTACTTTCAAGCCACGC	YES		1
137319	+							GTAGTGGCTGGGATAACAGTA			3
137529	-					32	ATATAA	TTATAGCCTTACCCTAGAATG	YES	YES	1
137629	-							GGATCGAGTTGGGCCGGGGAT			2
137799	-							TTTTAAAACTGACAGTTTAGG	YES	YES	15
137907	+							GCTGCCGGTTGCCATTTTTCA			1
138239	-							AGGGCACATTAGCAATGTTCT	YES	YES	1
138634	-							ACTAGGTTCCACCAAAGGTTA	YES	YES	2
138771	-							ATCAGGTCCCACCAAATGTTA	YES	YES	1
140238	+							TACACGTGATGTAAGTTTAGC	YES		1
140494	-	80	GCGGGG					GACCCGGCTGCAGCCGGCCAC			1
142964	-			94	ACCAAT	30	ATAAAA	CCGGCTCGCCAGCGTCGTCCA	YES		8
143128	+							GGCACCTGGAGGTCATTCTAT	YES		1
144271	+							ACCTATACCTGAGACTTCAAA	YES	YES	1
149552	-							TCTTTGGAGCGGAAGACAACG	YES	YES	2
149666	-							GCCAAGAGCTGCCTCCCTGCC			1
149927	-							GAGTTGTATTGGGGCCGCACC	YES		9
150043	-	129	GGGCGG			35	ATAAAA	GGCACAAACCGCTGCACATAG	YES	YES	1
150915	-					35	CTATAA	AAATCCTCACGACCTGTGTCT	YES	YES	6
151293	-							ACCAGGTGACAGTCACCGCCA	YES	YES	2
151317	-							GCCATTTTATGGACTCTCTCA	YES	YES	1
151545	+							CGAATTTTGTGCGCAAAAGTT	YES	YES	2
155958	-							GAGGGCGGCCGGACCCTCAGT	YES		1
156075	+							CCAGAGGCATGTTGCTGAGCG	YES	YES	2
157262	-					29	TATAAC	TTATTAGCTTGGCTACCTCTG	YES	YES	7
157315	-			111	GACCAA			GTTACACGAAGGGCCAGGAAG	YES		2
157326	+					38	ATAAAA	TTCGTGTAACGATCCTGGACG	YES	YES	1
158421	-	138	GGGCGG					CTCTACCTGCACCTCCAAATG	YES		7
160720	-							CCGTCCTGGCGGACAGCGTCC	YES	YES	2
163866	-							CCGGGGCGATACCTTGGGCAT	YES		9
164496	-					29	ATATAA	GAGCTGGCCTGACGAGACCAT	YES		6
164582	+					34	GTATAA	AGGAGAGTCCAGAGCAATGGC	YES	YES	1
164824	-							TTCTGTGGATATCAAAGAAGC	YES	YES	2
166572	-					37	GTATAA	CCTCACTCTCGAGATGGTACA	YES	YES	15
166685	-			125	GCCAAT			CAGAAACTAAGAGCTAGCCCA	YES	YES	7
167790	-							CATGGACCACGACACACTGAT	YES	YES	1
167865	-							CAAAACTGGTGGACTCTATTG	YES	YES	1
168206	-							CCTTTCCCTTACGCTTCCTTC	YES	YES	8
