# Supplementary material for: Transcriptome Profiling of Epstein-Barr Virus Using Nanopore Sequencing
Source: Research Square preprint supplement (doi:10.21203/rs.3.rs-109629/v1), 2020-11-20
Supplement: Supplementary file 12 [file e0ecefd64d97a9a619edfd3d.xlsx]

## Sheet: ReadStat
Samples	Read count	Mapped read count	Mapped fraction	Min read length	Min mapped read length	Mean read length	Stdev length	Mean mapped read length	Stdev mapped length	Median read length	Median mapped read length	Max read length	Max mapped read length
EBV_Akata_10m_bc37	377471	357	0.0009457680192650562	0	125	1284.234036522011	1017.728731644922	1087.221288515406	750.0751076965397	935.0	845.0	67384	5854
EBV_Akata_90m_bc38	1290361	1540	0.0011934644645955666	59	97	1482.358243933287	1012.6377290952189	1147.7772727272727	728.2866042367426	1311.0	1081.0	25814	5301
EBV_Akata_4h_bc39	467825	645	0.0013787206754662534	95	103	1688.7149382782022	1435.1253423497847	1176.4542635658916	853.1770001791798	1125.0	834.0	28546	4104
EBV_Akata_8h_bc40	2294230	6753	0.002943471229998736	0	82	1079.976407334923	880.2222099552557	1026.5225825559012	759.5323754294856	761.0	801.0	39503	5779
EBV_Akata_12h_bc41	135058	827	0.006123295176886967	0	87	1154.467836040812	911.9749850025466	956.328899637243	662.485466549253	875.0	714.0	13359	4039
EBV_Akata_24h_bc42	1854728	29939	0.016141989553185156	0	82	1214.8127806341415	1010.3844929268006	947.9391429239454	619.8095773076866	857.0	730.0	39507	8033
EBV_Akata_48h_bc43	625246	11123	0.017789797935532575	0	87	1376.357512083244	1210.058084709656	1032.412119032635	715.6545047391385	933.0	799.0	70470	6089
EBV_Akata_72h_bc44	245693	2577	0.010488699311742703	0	86	1836.9174131945151	1262.8886726348371	1452.9592549476135	820.6810478302565	1604.0	1314.0	17079	5613
EBV_Akata_10m_dcDNA_bc22	434909	476	0.0010944818341308182	70	121	1182.4724367626332	872.4704030397114	850.9789915966387	790.8993013152027	939.0	614.5	32576	7654
EBV_Akata_90m_dcDNA_bc21	364002	435	0.0011950483788550612	52	113	1171.753968384789	841.4361446974548	827.9471264367816	646.3756198205542	947.0	642.0	19985	3928
EBV_Akata_4h_dcDNA_bc20	529536	895	0.0016901589315929417	74	88	1171.9924481055111	896.764956652078	887.5731843575419	790.414249386728	922.0	630.0	33842	8389
EBV_Akata_8h_dcDNA_bc19	431278	1840	0.004266389660497406	61	90	1173.0310426221602	893.2773930642771	853.3880434782609	747.0556033273078	926.0	583.5	30534	6117
EBV_Akata_12h_dcDNA_bc18	426213	5130	0.012036235403425048	97	83	1178.0786109292771	858.0049772233554	835.9153996101364	682.2229428478554	941.0	626.0	20972	6884
EBV_Akata_24h_dcDNA_bc17	312634	6908	0.022096125181522163	121	90	1227.6548551980911	886.0649999597147	827.7711349160394	667.948471829885	983.0	646.0	33581	9191
EBV_Akata_48h_dcDNA_bc16	179106	5002	0.02792759594876777	104	86	1200.8547564012372	866.9940967221501	806.5413834466214	662.4415764565821	961.0	612.0	20019	9195
EBV_Akata_72h_dcDNA_bc24	79070	1636	0.02069052738080182	89	90	1151.8278740356645	836.8571680143988	701.0819070904646	527.3091387826503	932.0	543.0	21580	4279
EBV_Akata_rand_bc56_bc47	281541	392	0.0013923371729162005	0	94	1114.777733971251	765.9656526508961	920.8979591836735	633.4089920405855	916.0	777.5	13962	4829
